# Apical Constriction Reversal upon Mitotic Entry Underlies Different Morphogenetic Outcomes of Cell Division

Clint S. Ko<sup>1,†</sup>, Prateek Kalakuntla<sup>1</sup>, and Adam C. Martin<sup>1,\*</sup>

<sup>1</sup> Department of Biology, Massachusetts Institute of Technology, Cambridge, MA 02142

<sup>†</sup> Present address: Laboratory of Morphogenesis, The Rockefeller University, New York, NY 10065

\* Corresponding Author & Lead Contact:

Adam C. Martin  
acmartin@mit.edu  
31 Ames St.  
Cambridge, MA 02142, USA

## Running head (< 40 characters)

Mitosis antagonizes apical contractility

## Abbreviations used

Arm, Armadillo; Baz, Bazooka; Fog, Folded gastrulation; GPCR, G protein-coupled receptor; Pbl, Pebble; ROCK, Rho-associated coiled-coil kinase; Trbl, Tribbles

## 1 **Abstract**

2           During development, coordinated cell shape changes and cell divisions sculpt  
3 tissues. While these individual cell behaviors have been extensively studied, how cell  
4 shape changes and cell divisions that occur concurrently in epithelia influence tissue  
5 shape is less understood. We addressed this question in two contexts of the early  
6 *Drosophila* embryo: premature cell division during mesoderm invagination, and native  
7 ectodermal cell divisions with ectopic activation of apical contractility. Using quantitative  
8 live-cell imaging, we demonstrated that mitotic entry reverses apical contractility by  
9 interfering with medioapical RhoA signaling. While premature mitotic entry inhibits  
10 mesoderm invagination, which relies on apical constriction, mitotic entry in an artificially  
11 contractile ectoderm induced ectopic tissue invaginations. Ectopic invaginations  
12 resulted from medioapical myosin loss in neighboring mitotic cells. This myosin loss  
13 enabled non-mitotic cells to apically constrict through mitotic cell stretching. Thus, the  
14 spatial pattern of mitotic entry can differentially regulate tissue shape through signal  
15 interference between apical contractility and mitosis.

## 16 Introduction

17 Tissues grow in size and undergo complex morphogenetic movements to sculpt  
18 the embryo (LeGoff and Lecuit, 2015). Two major cell processes that contribute to  
19 morphogenesis are cell division and cell shape change. Often, these behaviors occur  
20 concurrently in the same tissue, leading to a complex interplay that can facilitate tissue-  
21 scale movements and shape changes (Etournay et al., 2015; Guirao et al., 2015; Li et  
22 al., 2014; Mao et al., 2013). For example, during the development of the *Drosophila*  
23 tracheal placode, cell division in the placode promotes fast cell internalization (Kondo  
24 and Hayashi, 2013). Cell divisions also drive cell rearrangements for proper gastrulation  
25 movements in the chick (Firmino et al., 2016) and promote tissue spreading during  
26 zebrafish epiboly (Campinho et al., 2013).

27 Apical constriction is a cell shape change that promotes tissue invagination  
28 (Leptin and Grunewald, 1990; Sawyer et al., 2010). During *Drosophila* gastrulation, the  
29 presumptive mesoderm cells on the ventral side of the embryo are internalized through  
30 coordinated apical constrictions to form the ventral furrow (Leptin and Grunewald, 1990;  
31 Sweeton et al., 1991). Apical contractility is activated by embryonic transcription factors  
32 Snail and Twist, which define mesoderm fate and also activate non-muscle myosin 2  
33 (myosin) contractility through the small GTPase RhoA at the apical surface of cells  
34 (Costa et al., 1994; Dawes-Hoang et al., 2005; Kölsch et al., 2007; Young et al., 1991).  
35 In contrast to cases where cell divisions promote morphogenesis (Firmino et al., 2016;  
36 Kondo and Hayashi, 2013), premature mitotic entry during mesoderm invagination  
37 disrupts internalization (Großhans and Wieschaus, 2000; Mata et al., 2000; Seher and  
38 Leptin, 2000). Thus, cell division is actively repressed in the mesoderm. The *tribbles*

39 (*trbl*) gene is one ventral-specific inhibitor of mitosis. In *trbl* mutants, cells in the  
40 prospective mesoderm prematurely divide, which disrupts mesoderm invagination  
41 (Großhans and Wieschaus, 2000; Mata et al., 2000; Seher and Leptin, 2000). This  
42 phenotype demonstrated the importance of coordinating cell shape change with cell  
43 cycle regulation, but it was not known how cell division disrupts mesoderm invagination.  
44 For example, without live-cell imaging it was unclear whether cell division prevents  
45 apical constriction from initiating and/or whether it interferes with apical constriction after  
46 it has started.

47       After 13 rounds of synchronous divisions in the early *Drosophila* embryo, the 14<sup>th</sup>  
48 cycle of mitotic divisions occurs in a stereotypical pattern across the blastula, called  
49 mitotic domains, which correspond to regions of *string* (*stg*) expression (Edgar and  
50 Datar, 1996; Edgar and O'Farrell, 1989, 1990; Farrell and O'Farrell, 2014; Foe, 1989).  
51 String is the *Drosophila* homolog of Cdc25, a protein phosphatase that reverses  
52 inhibitory phosphorylation on cyclin-dependent kinase (Cdk1) (Gould et al., 1990;  
53 Russell and Nurse, 1986). Tribbles acts to degrade String protein in the mesoderm  
54 (Mata et al., 2000). While ventral fate-specific mitotic inhibition promotes mesoderm  
55 internalization, how the geometry and timing of mitotic entry influences cell and tissue  
56 shape change in other regions of the embryo is unknown.

57       Here, we determined how different spatial patterns of mitotic entry interact with  
58 apically constricting cells to affect tissue shape. In both native and artificially induced  
59 contractile epithelia, mitotic entry disrupts medioapical myosin activation and abrogates  
60 apical constriction. In the mesoderm, this disrupts tissue internalization. We showed that  
61 disruption of apical contractility is not due to loss of cell adhesion or apicobasal polarity

62 but depends on mitotic entry. In contrast, ectopically contractile cells in the dorsal  
63 ectoderm situated between mitotic domains only apically constricted and invaginated  
64 when neighboring cells entered mitosis. In this context, internalization was associated  
65 with a force imbalance resulting from the loss of medioapical contractility in mitotic cells  
66 that neighbor contractile, non-mitotic cells. These results indicate that distinct  
67 morphogenetic outcomes result from different spatiotemporal patterns of mitotic entry  
68 and resulting changes in force generation.

## 69 **Results**

70

### 71 **Premature mesodermal mitotic entry in *trbl* mutant embryos prevents or reverses** 72 **anisotropic apical constriction**

73 Previous studies used fixed embryos to study the *trbl* mutant phenotype so that it  
74 was not known how cell division disrupts mesoderm invagination. Therefore, to  
75 determine whether cell division prevents apical constriction from starting and/or  
76 impedes apical constriction after it has initiated, we imaged the apical surface of *trbl*  
77 mutant mesoderm cells in real time. We first verified the effectiveness of *trbl* RNA  
78 interference (RNAi) by imaging live embryos labeled for Histone::GFP (H2A::GFP) and  
79 membranes (Gap43::mCherry). Histone::GFP allowed us to visualize chromosome  
80 condensation, which marked mitotic entry. Consistent with previous work, *trbl* RNAi  
81 knockdown resulted in premature cell divisions in the mesoderm and a failure to form  
82 the ventral furrow (9/16 embryos) (Figure 1, A and B; Video 1) (Großhans and  
83 Wieschaus, 2000; Mata et al., 2000; Seher and Leptin, 2000). The timing of mitotic entry  
84 was variable in *trbl* RNAi embryos, which allowed us to determine the effects of mitotic  
85 entry when it happens either before or after apical constriction onset (Figure 1, B and C).

86 To quantify the effect of mitotic entry, we segmented representative embryos  
87 from these data sets. Normally, apical constriction of the mesoderm is associated with  
88 tissue invagination (Figure 1A') (Costa et al., 1994; Leptin and Grunewald, 1990;  
89 Sweeton et al., 1991). In contrast to control embryos, mesoderm cells in *trbl* RNAi  
90 embryos increased apical cell area as a consequence of mitotic rounding, a common  
91 phenomenon observed in non-constricting epithelial cells (Champion et al., 2016;

92 Luxenburg et al., 2011; Reinsch and Karsenti, 1994; Rosa et al., 2015), which disrupted  
93 invagination (Figure 1, B and B'; Video 1). Because the timing of premature mitotic entry  
94 was variable such that not all cells synchronously divided, in several cases we found  
95 individual cells and embryos that had initiated apical constriction that then reversed their  
96 constricted shape and underwent apical expansion (Figure 1, C and C'). Thus, mitotic  
97 mesoderm cells do not sustain apical constriction.

98 An important feature of mesoderm cell apical constriction is that it is anisotropic,  
99 with greater constriction along the dorsoventral axis, which is important for inward tissue  
100 curvature and invagination (Figure 1D) (Chanet et al., 2017; Heer et al., 2017). This is  
101 reflected in the gradual increase of cell apex anisotropy (Figure 1D, anisotropy > 1) in  
102 control embryos after cells have initiated apical constriction (Figure 1E). However, in *trbl*  
103 embryos, after initial anisotropic constrictions, cell anisotropy decreased and  
104 approached a value of 1 due to mitotic rounding (Figure 1E). These results suggested  
105 that premature mitotic entry in the mesoderm can either prevent apical constriction from  
106 initiating or reverse apical constriction that has already started, depending on the timing  
107 of mitotic entry.

108

### 109 **Mitotic entry disrupts medioapical myosin activation**

110 Apical constriction and mitotic rounding are dependent on actomyosin-based  
111 contractility (Dawes-Hoang et al., 2005; Kunda et al., 2008; Maddox and Burridge, 2003;  
112 Matthews et al., 2012; Rosa et al., 2015; Young et al., 1991). In the mesoderm, this  
113 involves an organized contractile machine with myosin enriched near the middle of the  
114 apical domain, the medioapical cortex (Mason et al., 2013; Coravos and Martin, 2016).

115 To determine how premature mitotic entry in *trbl* mutants affected medioapical myosin,  
116 we imaged live embryos that were trans-heterozygous for a deficiency (Df(3L)ri79c) and  
117 a P-element insertion (EP(3)3519) that disrupt the *trbl* gene, which has previously been  
118 shown to exhibit the *trbl* mutant phenotype (Großhans and Wieschaus, 2000; Seher and  
119 Leptin, 2000). In contrast to wild-type or heterozygote embryos, which accumulate and  
120 sustain medioapical myosin, medioapical myosin failed to accumulate in Df/EP3519  
121 embryos, with myosin instead localizing to junctional interfaces (Figure 2, A and B;  
122 Video 2). Despite initiating myosin accumulation, medioapical myosin was not sustained  
123 in ventral cells that entered mitosis (Figure 2, A and B; Video 2). We obtained a similar  
124 absence of medioapical myosin accumulation when we overexpressed *string* (Cdc25) in  
125 the early embryo (Figure S1A), which phenocopies *trbl* embryos (Großhans and  
126 Wieschaus, 2000; Seher and Leptin, 2000). In both *trbl* mutant and *string*  
127 overexpression embryos, medioapical myosin re-accumulated in ventral cells after  
128 completion of mitosis (Figure S1; Video 2). Thus, medioapical myosin activation is  
129 disrupted in ventral cells that prematurely enter mitosis, consistent with the observed  
130 increases in apical cell area (Figure 1, B and B').

131 To determine whether loss of medioapical myosin was a general feature of  
132 dividing, contractile epithelial cells, we took advantage of the stereotyped cell divisions  
133 in the early mitotic domains that occur on the dorsal side of the head (Foe, 1989),  
134 particularly focusing on mitotic domains 1 and 5 (Figure 2C). We artificially increased  
135 ectoderm apical contractility by ectopically expressing *folded gastrulation* (*fog*), a ligand  
136 for a G-protein-coupled receptor (GPCR) that is expressed in the mesoderm and  
137 functions upstream of apical myosin activation (Costa et al., 1994; Dawes-Hoang et al.,



138 2005; Manning et al., 2013; Sweeton et al., 1991). However, a GPCR for Fog is also  
139 present in the ectoderm and ectopic *fog* expression in this tissue leads to apical myosin  
140 accumulation (Dawes-Hoang et al., 2005; Kerridge et al., 2016). This allowed us to  
141 upregulate apical myosin levels consistently prior to mitotic entry and to compare apical  
142 myosin levels in mitotic and non-mitotic cells in the same tissue without interfering with  
143 the normal developmental progression of cell divisions in the embryo. Similar to *trbl*  
144 mutant embryos, Fog-induced medioapical myosin decreased in mitotic cells (Figure 2,  
145 D–F; Video 3). As medioapical myosin spots dissipated, myosin localization became  
146 isotropically localized around the cell cortex, a feature of mitotic rounding (Figure 2, D  
147 and E) (Maddox and Burrige, 2003; Matthews et al., 2012; Ramanathan et al., 2015;  
148 Rosa et al., 2015; Stewart et al., 2010). The medioapical myosin meshwork returned in  
149 both daughter cells after mitotic exit and cytokinesis (Figure 2E). These results  
150 suggested that mitotic entry temporarily overrides cell type-specific signaling in both  
151 mesoderm and ectoderm that promotes apical contractility.

152

### 153 **Medioapical myosin disruption is not due to loss of cell adhesion or apicobasal** 154 **polarity**

155 Because cells round up upon disruption of adherens junctions (Martin et al.,  
156 2010), it was possible that mitotic entry disrupted intercellular adhesion. However, the  
157 disruption of medioapical myosin preceded the apical cell area expansion (i.e., rounding)  
158 (Figure 2F), suggesting the apical myosin loss is not caused by disrupted adhesion. To  
159 test whether changes in myosin regulation were dependent on changes in cell shape or  
160 adhesion during cell division, we disrupted cell adhesion with a maternal and zygotic

161 loss-of-function mutant in the *Drosophila*  $\beta$ -catenin gene (*armadillo*, *arm*) and analyzed  
162 mitotic progression. The *arm* mutant disrupts the mechanical integrity of tissues,  
163 causing constitutively round cells that do not invaginate (Cox et al., 1996; Dawes-Hoang  
164 et al., 2005). However, even when cell adhesion was lost and individual cells became  
165 rounded, apical contractility was sustained (Figure 3, A and B) (Dawes-Hoang et al.,  
166 2005; Martin et al., 2010).

167         During gastrulation, cell division normally proceeds in mesoderm cells after they  
168 have internalized (Foe, 1989). However, because *arm* mutants block invagination, we  
169 could examine the consequence of mitotic entry on non-adherent cells at the embryo  
170 surface. In *arm* mutants, apical myosin spots disappeared only when the mesoderm  
171 cells entered mitosis even though cells had maintained a rounded morphology prior to  
172 mitoses (Figure 3, C and D) (Foe, 1989). Thus, the switch in myosin regulation is  
173 independent of changes in cell shape and adhesion, suggesting that mitotic entry  
174 disrupts other processes that are required for apical contractility.

175         Alternatively, we hypothesized that apical contractility defects could be due to a  
176 loss of apicobasal polarity. To test this, we determined if mitotic entry of ectodermal  
177 cells in embryos with ectopic *fog* expression affected the apical-basal polarity of  
178 Bazooka (Baz, Par3), a component of the apical polarity complex that plays an  
179 important role in establishing and maintaining apicobasal polarity (Bilder et al., 2003;  
180 Harris and Peifer, 2004, 2007). In cells of embryos with ectopic *fog* expression, Baz was  
181 localized to apical junctions (Figure 3, E–G). However, in mitotic cells, polarized Baz  
182 localization was retained during mitotic rounding (Figure 3, F and G), suggesting that

183 loss of medioapical myosin at the onset of mitotic rounding was also not due to a loss of  
184 apicobasal polarity.

185

### 186 **Mitotic entry in apically constricting cells changes RhoA regulation**

187 To determine the basis for mitosis-dependent changes in myosin localization, we  
188 examined RhoA activity in *trbl* mutants and in the early mitotic domains of embryos with  
189 ectopic *fog* expression. Apical constriction and mitotic rounding involve RhoA activation  
190 downstream of the Rho guanine nucleotide exchange factors (GEFs), RhoGEF2 and  
191 Ect2/Pebble (Pbl), respectively (Barrett et al., 1997; Häcker and Perrimon, 1998; Kölsch  
192 et al., 2007; Maddox and Burridge, 2003; Matthews et al., 2012; Rosa et al., 2015;  
193 Yoshizaki et al., 2003). As a marker for RhoA activity, we first examined the localization  
194 of a GFP-tagged Rho-associated coiled-coil kinase (ROCK) (Simões et al., 2010), the  
195 RhoA effector that exhibits RhoA-dependent medioapical cortex localization during  
196 apical constriction (Mason et al., 2016). ROCK phosphorylates and activates myosin  
197 (Amano et al., 1996; Mason et al., 2013; Mizuno et al., 1999; Royou et al., 2002). In  
198 *Df/EP3519 trbl* mutant embryos, medioapical ROCK localization either did not  
199 accumulate or was lost in mesoderm cells when they prematurely entered mitosis  
200 (Figure 4, A and B). Thus, mitotic entry disrupted medioapical ROCK localization  
201 associated with apical constriction, suggesting a disruption of medioapical RhoA activity.

202 To determine how RhoA activity was disrupted, we investigated the localization  
203 of RhoGEFs that are associated with either apical constriction or mitotic rounding. We  
204 imaged mitotic domains in embryos ectopically expressing *fog*, due to technical  
205 challenges with combining GFP-tagged RhoGEFs with the *trbl* mutants. First, we fixed

206 embryos with ectopic *fog* expression that also expressed GFP-tagged RhoGEF2 under  
207 an endogenous promoter and immunostained with an anti-GFP antibody.  
208 Immunofluorescence of fixed embryos gave us the clearest signal to visualize RhoGEF2  
209 in mitotic cells because the autofluorescence of the vitelline membrane could be  
210 removed. Consistent with previous work in mesoderm cells, non-mitotic ectoderm cells  
211 ectopically expressing *fog* exhibited apically enriched, junctional RhoGEF2 (Figure 4C)  
212 (Kölsch et al., 2007; Mason et al., 2016). In contrast, there was a clear reduction of  
213 apico-junctional RhoGEF2 and an associated increase in cytoplasmic signal in mitotic  
214 cells (Figure 4C, yellow arrowheads; Figure 4D). In conjunction with the observed  
215 changes in RhoGEF2 localization, Ect2/Pbl relocated from the nucleus to the cortex in  
216 mitotic domain cells and became enriched at the spindle midzone during cytokinesis,  
217 similar to what has been described for other non-apically constricting cells (Figure 4E)  
218 (Matthews et al., 2012; Rosa et al., 2015). These results suggested that Ect2/Pbl-  
219 mediated cortical contractility is distinct from medioapical contractility mediated by  
220 RhoGEF2 (Kölsch et al., 2007) and that changes in RhoGEF2 localization underlie the  
221 disruption of medioapical myosin activation.

222

### 223 **Mitotic entry flanking contractile tissue promotes invagination via downregulation** 224 **of opposing force**

225 While premature mitotic entry in the mesoderm inhibited invagination, we  
226 discovered that cell divisions in the dorsal head of embryos with ectopic *fog* expression  
227 promoted ectopic tissue invaginations (Figure 5, A and B; Video 3). Normally, mitotic  
228 domains do not result in furrow formation (Foe 1989), as shown in control embryos

229 lacking ectopic *fog* expression (Figure S2). In contrast, when *fog* was ectopically  
230 expressed in embryos, ectopic furrows formed between mitotic domains in regions  
231 where cells maintained apical contractility (Figure 5, A and B; Video 3).

232 To determine how furrows formed between mitotic domains, we analyzed the  
233 apical area of non-mitotic cells that formed the ectopic furrow. In control embryos, non-  
234 mitotic cells situated between mitotic domains did not exhibit a net decrease in apical  
235 area, presumably because these cells did not generate contractile force (Figure 5C). In  
236 contrast, cells between mitotic domains in embryos ectopically expressing *fog*  
237 underwent apical constriction (Figure 5, B and C, compare salmon boxes, left graph).  
238 Importantly, invagination onset was triggered when cells in the mitotic domains entered  
239 mitosis (Figure 5, A and B; Video 3), and these invaginations occurred before the  
240 completion of cytokinesis, suggesting that mitotic entry and not increased cell number  
241 promoted invagination. Thus, within a uniformly contractile tissue, domains of cells that  
242 enter mitosis can promote constriction and invagination of neighboring cells.

243 Because furrowing only occurred when the ectoderm was contractile, we tested  
244 how mitotic domains promote apical constriction in neighboring cells. One hypothesis is  
245 that furrowing could be due to isotropic pushing forces generated by mitotic rounding  
246 (Kondo and Hayashi, 2013). Alternatively, because mitotic entry reduces medioapical  
247 contractility, mitotic entry could downregulate force that opposes constriction and allow  
248 neighboring cells to change shape. Cell expansion or relaxation is important for  
249 morphogenesis in other contexts, often compensating for changes in neighboring tissue  
250 regions (Gutzman and Sive, 2010; Perez-Mockus et al., 2017; West et al., 2017). If the  
251 latter case is true, one prediction is that mitotic cells would stretch towards the ectopic

252 furrow because of pulling forces from adjacent, contractile cells. Consistent with both  
253 hypotheses, the apical areas of mitotic cells increased to the same extent regardless of  
254 *fog* expression (Figure 5C, compare mint green boxes, left graph). However, mitotic  
255 domain cells in embryos with ectopic *fog* expression were more elongated and  
256 stretched towards the ectopic furrow with a greater increase in cell apex anisotropy than  
257 control embryos (Figure 5C, compare mint green boxes, right graph), suggesting that  
258 the intervening non-mitotic cells that apically constrict pull and stretch mitotic cells. In  
259 addition, we measured the cell aspect ratio (major/minor axis of fitted ellipse) and  
260 compared control and ectopic *fog* embryos. In both cases, mitotic cells exhibited an  
261 initial decrease in cell aspect ratio (due to cell rounding) but increased in aspect ratio  
262 prior to cytokinesis, likely during anaphase (Figure 5D) (Ramkumar and Baum, 2016).  
263 However, we found that mitotic cells from embryos with ectopic *fog expression* exhibited  
264 a greater change in cell aspect ratio (i.e., more elongation) (Figure 5D; Figure S3),  
265 suggesting that the higher anisotropy of dividing cells in tissues with ectopic contractility  
266 cannot be fully explained by normal anaphase elongation. Furthermore, the apical area  
267 of ectopic furrow cells only reduced after neighboring cells entered mitosis (Figure 5E),  
268 lending additional support for the idea that mitotic cell rounding and then elongation  
269 relative to neighboring non-mitotic cells, creates a force imbalance that allows  
270 neighboring cells to apically constrict and invaginate. These results indicated that the  
271 reversal of medioapical contractility and apical expansion that occurs during mitotic  
272 entry promotes tissue invagination when mitotic entry occurs adjacent to contractile  
273 cells (Figure 6).

## 274 Discussion

275 Here, we investigated the impact of mitotic entry in two different contractile  
276 epithelia with opposing tissue shape outcomes. Cell cycle-regulated changes in the cell,  
277 in particular the formation of an isotropic actomyosin cortex during mitotic rounding, is  
278 commonly observed across epithelial cell types and has been well-characterized  
279 (Maddox and Burridge, 2003; Matthews et al., 2012; Ramanathan et al., 2015; Rosa et  
280 al., 2015; Sorce et al., 2015; Stewart et al., 2010). However, it was previously unknown  
281 how mitotic entry would dynamically affect epithelial cells that are actively constricting.  
282 Through live imaging of apically constricting cells undergoing mitosis, we found that  
283 mitotic entry disrupts medioapical contractile signaling. In both the mesoderm of *trbl*  
284 mutants and the ectoderm with ectopic *fog* expression, medioapical myosin  
285 accumulation was reversed. We found that this change was followed by cell rounding  
286 and isotropic cortical myosin accumulation, which are specific to mitotic entry and not  
287 due to loss of cell adhesion. Indeed, previous work has demonstrated that mitotic  
288 progression in embryonic epithelial cells is only associated with local remodeling of cell  
289 adhesion at the site of cytokinesis, which allows epithelial integrity to be maintained  
290 (Founounou et al., 2013; Guillot and Lecuit, 2013; Herszterg et al., 2013; Higashi et al.,  
291 2016). The loss of medioapical myosin was not due to loss of cell adhesion or  
292 apicobasal polarity because mitotic downregulation of myosin still occurred in *arm*  
293 mutant germline clones and Baz localization remained apical throughout mitosis.  
294 Importantly, we also found that mitotic entry disrupts medioapical RhoA signaling and  
295 cortical RhoGEF2 localization, even though Ect2/Pbl becomes cortical, as previously  
296 reported (Matthews et al., 2012; Rosa et al., 2015).

297           We present a new paradigm for how cell divisions influence morphogenetic  
298 events: cell cycle-dependent changes in RhoA regulation can either inhibit or promote  
299 tissue shape change depending on differences in the spatiotemporal pattern of mitotic  
300 entry in the tissue. During mesoderm invagination, mitotic downregulation of  
301 medioapical contractility in the same cells that are needed to undergo apical constriction  
302 disrupted invagination (Großhans and Wieschaus, 2000; Leptin and Grunewald, 1990;  
303 Mata et al., 2000; Seher and Leptin, 2000; Sweeton et al., 1991). In contrast, mitotic  
304 downregulation of medioapical contractility in cells neighboring contractile cells  
305 promoted invagination. Here, we propose that medioapical myosin loss upon mitotic  
306 entry caused apical cortex relaxation relative to neighboring contractile cells. In support  
307 of this force imbalance model, mitotic cells elongate towards constricting cells prior to  
308 cytokinesis, leading to mitotic cell shape anisotropy that is higher than mitotic cells not  
309 neighboring contractile cells. In contrast, mitotic cells in the mesoderm of *trbl* mutants  
310 expanded their apical areas isotropically and remain isotropic through cytokinesis. Thus,  
311 cell cycle-mediated loss of medioapical myosin can be harnessed to provide local  
312 regions of tissue relaxation that can drive tissue folding.

313           Mitotic entry overrides or inhibits intracellular signaling that promotes the  
314 assembly of the medioapical contractile machine, remodeling the cytoskeleton in a way  
315 that leads to relaxation of the apical cortex. This creates a force imbalance where  
316 mitotic cells can become more compliant relative to their neighbors. This is similar to the  
317 idea that lateral ectoderm cells in the *Drosophila* embryo are less stiff, allowing the  
318 mesoderm to internalize (Perez-Mockus et al., 2017). Differences in epithelial tension  
319 also drive tissue folds in the *Drosophila* wing discs (Sui et al., 2018) and differential cell



320 division and growth contribute to the positioning of these folds (Tozluoglu et al., 2019).  
321 In light of our results, it would be interesting to examine whether epithelial invagination  
322 in other contexts are bordered by cell divisions.

323 One potential molecular explanation for why medioapical myosin is lost during  
324 mitosis is that the two distinct cytoskeletal organizations that promote apical constriction  
325 or mitotic rounding compete for a limited pool of cytoskeletal components. Limited  
326 availability of actin monomers have been shown to play a role in how different actin  
327 network densities and sizes are regulated (Suarez and Kovar, 2016). For example, in  
328 fission yeast, inhibiting F-actin polymerization through the Arp2/3 complex results in an  
329 increase in formin-mediated F-actin assembly (Burke et al., 2014). However, given the  
330 apparent changes to RhoA signaling that occur in *fog* positive cells that enter mitosis,  
331 we favor a model in which signaling crosstalk or competition for upstream signals  
332 disrupts apical RhoA signaling (Agarwal and Zaidel-Bar, 2019; Jaffe and Hall, 2005).

333 To promote the assembly of medioapical actomyosin networks in the early  
334 *Drosophila* embryo, RhoGEF2 is the primary RhoA GEF (Barrett et al., 1997; Dawes-  
335 Hoang et al., 2005; De Las Bayonas et al., 2019; Fox and Peifer, 2007; Häcker and  
336 Perrimon, 1998; Kölsch et al., 2007). RhoGEF2 is thought to be particularly important  
337 for activating medioapical contractility (De Las Bayonas et al., 2019; Kerridge et al.,  
338 2016). To promote mitotic rounding, Ect2/Pebble is the primary RhoA activator  
339 (Matthews et al., 2012; Rosa et al., 2015). Our results indicate that these distinct Rho  
340 GEFs do not act additively. However, the precise nature by which RhoA activity is  
341 regulated downstream of RhoGEF2 and Ect2/Pebble in the same cell is still unclear.  
342 Activation of mitotic entry may affect RhoGEF2 localization because medioapical

343 RhoGEF2 is influenced by microtubules and microtubule dynamics change in mitosis  
344 (De Las Bayonas et al., 2019; Rogers et al., 2004). However, disruption of microtubules  
345 does not prevent medioapical myosin activation (Ko et al., 2019). Mitotic entry may also  
346 affect signaling processes upstream of Rho GEF activation, such as the well-  
347 characterized case of GPCR signaling in *Drosophila* that activates different modes of  
348 contractility (Costa et al., 1994; Dawes-Hoang et al., 2005; Jha et al., 2018; Kerridge et  
349 al., 2016).

## Materials and Methods

### Fly stocks and genetics

Fly stocks and crosses used in this study are listed in Table S1. Crosses were maintained at 27 °C. In the F2 generation, non-balancer females and males were used to set up cages that were incubated at 25 °C. All other crosses and cages were maintained at 25 °C. To generate maternal and zygotic *arm* mutants expressing Myo::GFP, *arm*<sup>034A01</sup> FRT101/FM7; sqh-GFP females were crossed to male *ovo*<sup>D</sup> FRT101/Y; hsFlp to obtain *arm*<sup>034A01</sup> FRT101/ *ovo*<sup>D</sup> FRT101 females. These females were heat shocked at the larval stage at 37 °C for 2 hours over 3 to 4 days to induce mitotic recombination.

### Live and fixed imaging

For live imaging, embryos were dechorionated in 50% bleach, washed in water, and mounted onto a glass slide coated with glue (double-sided tape dissolved in heptane). Coverslips (No. 1.5) coated in glue were attached to the slide to use as spacers and a No. 1 coverslip was attached on top to create a chamber. Halocarbon 27 oil was used to fill the chamber. All imaging took place at room temperature (~ 23 °C).

For fixed imaging, embryos with ectopic *fog* expression and control (Rhodopsin-3 shRNA line) embryos were dechorionated in bleach, washed in water, and fixed in 8% paraformaldehyde in 0.1 M phosphate buffer at pH 7.4 with 50% heptane for 30 min and manually devitellinized with a 26 G ½ hypodermic needle (Beckton Dickinson). Embryos were washed in 0.01% Tween 20 in PBS (PBS-T) and blocked with 10% BSA in PBS-T

(blocking buffer) for 1 hour. Primary antibodies were diluted in a 50:50 mixture of blocking buffer:PBS-T (dilution buffer) and embryos were incubated for 2 hours at room temperature or overnight at 4 °C. To visualize RhoGEF2, we used embryos that expressed GFP-tagged RhoGEF2 under an endogenous promoter, which was recognized with an anti-GFP antibody (produced by our lab) diluted at 1:500. F-actin was visualized by incubating embryos with Alexa Fluor 647-conjugated phalloidin (Invitrogen) in dilution buffer. Secondary antibodies against the rabbit anti-GFP antibody was conjugated with Alexa Fluor 488 (Invitrogen) diluted at 1:500 in dilution buffer and incubated for 2 hours at room temperature or overnight at 4 °C. After incubations, embryos were mounted onto glass slides using AquaPolymount (Polysciences) and dried overnight.

All images were taken on a Zeiss LSM 710 confocal microscope with a 40x/1.2 Apochromat water objective lens, an argon ion, 561 nm diode, 594 nm HeNe, 633 HeNe lasers, and Zen software. Pinhole settings ranged from 1 – 2.5 airy units. For two-color live imaging, band-pass filters were set at ~490 – 565 nm for GFP and ~590 – 690 nm for mCH. For three-color imaging, band-pass filters were set at ~480 – 560 nm for Alexa Fluor 488 and ~660 – 750 nm for Alexa Fluor 647.

### **dsRNA injections**

To generate dsRNA that targets *trbl* transcripts for RNAi, the following primers were used to generate ~200-base pair fragment: forward, 5'- TAA TAC GAC TCA CTA TAG GGT GCA GTA TGA ATC ACT GGA AGG -3', and reverse, 5'- TAA TAC GAC TCA CTA TAG GGC CAC CAA CAT GGT GTA CAG G-3'. Each primer contains a T7

sequence at its 5' end for use with the MEGAshortscript T7 transcription kit (Thermo Fisher Scientific). The reaction was placed in boiling water and allowed to cool to room temperature to promote annealing. RNA was extracted with phenol:chloroform, washed with ethanol, and resuspended in injection buffer (0.1x phosphate-buffered saline in DEPC water).

Dechorionated embryos were mounted onto glass slides and desiccated for 4 minutes using Drierite (Drierite). Embryos were covered with a 3:1 mixture of halocarbon 700/halocarbon 27 oils and then injected laterally with dsRNA in injection buffer into stage 2 embryos. As a control, injection buffer was injected. After injection, excess oil was wicked off and slides were prepared for live imaging. Embryos were incubated at 25 °C until they had completed cellularization.

### **Image processing and analysis**

All images were processed using MATLAB (MathWorks) and FIJI (<http://fiji.sc/wiki/index.php/Fiji>). A Gaussian smoothing filter (kernel = 1 pixel) was applied. Apical projections are maximum intensity Z-projections of multiple z sections (2-4  $\mu\text{m}$ ) and sub-apical sections are optical slices that are 1 – 2  $\mu\text{m}$  below the apical sections.

Image segmentation for quantifications of cell area and anisotropy as well as myosin intensities was performed using custom MATLAB software titled EDGE (Embryo Development Geometry Explorer; <https://github.com/mgelbart/embryo-development-geometry-explorer>; Gelbart et al., 2012). Cell boundaries were automatically detected and manually corrected, after which EDGE exported cell area and anisotropy data. Cell

apex anisotropy is calculated by fitting an ellipse to each cell. This measurement is calculated relative to the embryonic anteroposterior (AP) and dorsoventral (DV) axes. The length from the center of the ellipse to the edge along the AP axis is divided by the length from the center to the edge along the DV axis. For Figure 5D, we quantified cell aspect ratio, which is calculated from the geometry of the fitted ellipse. The aspect ratio is defined as the length of the major axis from the centroid to the edge of the ellipse over the length of the minor axis from the centroid to the edge. For the cell aspect ratios (Figure 5D) and cell area analysis of mitotic domain and non-mitotic domain cells (Figure 5E), we smoothed the data for each cell by a moving average (5 time steps wide). For the myosin intensity quantification in Figure 2F, medial myosin intensity was measured in EDGE as the total integrated pixel intensity of Myo::GFP signal at the apical cortex, excluding the segmented cell boundary.

To calculate the average medial myosin intensity before and during division in *arm* mutants (Figure 3D), the apical intensity of myosin in the cell was calculated with EDGE, as described above. The myosin intensities of mitotic cells were measured when the nuclear envelope had broken down. For these same cells, myosin intensity before division was measured 7 minutes prior to nuclear envelope breakdown. To calculate the ratio of apical:basal Baz::GFP intensities (Figure 3E), orthogonal (x-z) images were created for individual cells. A 2.5  $\mu\text{m}$  by 17  $\mu\text{m}$  region of interest was specified and the maximum pixel intensity within the region was calculated. This was done for both apical and basolateral regions, where the basolateral region was defined as being 17  $\mu\text{m}$  lower than the apical region. The mean background fluorescence was subtracted from the maximum pixel intensities of the apical and basal regions for each cell. The ratio of

apical to basal intensity was then calculated by dividing the corrected apical intensity by the corrected basal intensity. The ratio of average cytoplasmic to junctional RhoGEF2 intensity (Figure 4D) was measured as described above for apical:basal Baz::GFP intensities. First, orthogonal images were created. To acquire the intensity of RhoGEF2, a .5  $\mu\text{m}$  by 7  $\mu\text{m}$  region of interest in the apical region of the cell membrane was specified and the average pixel intensity within the region was measured. The cytoplasmic region was defined as the middle of the cell, excluding the nucleus, and average RhoGEF pixel intensity was measured in a 3.5  $\mu\text{m}$  by 1  $\mu\text{m}$  region. To calculate the ratio, the cytoplasmic value was divided by the junctional value.

## Acknowledgments

We would like to thank members of the Martin laboratory for their helpful comments and suggestions on the project. We would also like to thank Iain Cheeseman and Becky Lamason for their suggestions on the project and comments on a draft of this manuscript. Finally, we thank the Bloomington Stock Center and the TRiP at Harvard Medical School (NIH/NIGMS R01-GM084947) for providing fly stocks used in this study. This work was supported by National Institute of General Medical Sciences grant R01-GM125646 to A. C. Martin.

Author contributions: C.S. Ko and A.C. Martin conceptualized the project and designed experiments. C.S. Ko and P. Kalakuntla performed the experiments. C.S. Ko and P. Kalakuntla analyzed the data. C.S. Ko and A.C. Martin wrote the manuscript. All authors reviewed and approved the final version of the manuscript.



## References

- Agarwal, P., and Zaidel-Bar, R. (2019). Principles of Actomyosin Regulation In Vivo. *Trends in Cell Biology* 29, 150-163.
- Amano, M., Ito, M., Kimura, K., Fukata, Y., Chihara, K., Nakano, T., Matsuura, Y., and Kaibuchi, K. (1996). Phosphorylation and Activation of Myosin by Rho-associated Kinase (Rho-kinase). *The Journal of Biological Chemistry* 271, 20246-20249.
- Barrett, K., Leptin, M., and Settleman, J. (1997). The Rho GTPase and a Putative RhoGEF Mediate a Signaling Pathway for the Cell Shape Changes in *Drosophila* Gastrulation. *Cell* 91, 905-915.
- Bilder, D., Schober, M., and Perrimon, N. (2003). Integrated activity of PDZ protein complexes regulates epithelial polarity. *Nature Cell Biology* 5, 53-58.
- Burke, T.A., Christensen, J.R., Barone, E., Suarez, C., Sirotkin, V., and Kovar, D.R. (2014). Homeostatic Actin Cytoskeleton Networks Are Regulated by Assembly Factor Competition for Monomers. *Current Biology* 24, 579-585.
- Campinho, P., Behrndt, M., Ranft, J., Risler, T., Minc, N., and Heisenberg, C.-P. (2013). Tension-oriented cell divisions limit anisotropic tissue tension in epithelial spreading during zebrafish epiboly. *Nature Cell Biology* 15, 1405-1414.
- Champion, L., Linder, M.I., and Kutay, U. (2016). Cellular Reorganization during Mitotic Entry. *Trends in Cell Biology* 27, 26-41.
- Chanet, S., Miller, C.J., Vaishnav, E.D., Ermentrout, B., Davidson, L.A., and Martin, A.C. (2017). Actomyosin meshwork mechanosensing enables tissue shape to orient cell force. *Nature Communications* 8, 15014.
- Costa, M., Wilson, E.T., and Wieschaus, E.F. (1994). A Putative Cell Signal Encoded by the folded gastrulation Gene Coordinates Cell Shape Changes during *Drosophila* Gastrulation. *Cell* 76, 1075-1089.
- Cox, R.T., Kirkpatrick, C., and Peifer, M. (1996). Armadillo is required for adherens junction assembly, cell polarity, and morphogenesis during *Drosophila* embryogenesis. *The Journal of Cell Biology* 134, 133-148.
- Dawes-Hoang, R.E., Parmar, K.M., Christiansen, A.E., Phelps, C.B., Brand, A.H., and Wieschaus, E.F. (2005). folded gastrulation, cell shape change and the control of myosin localization. *Development* 132, 4165-4178.
- De Las Bayonas, A.G., Philippe, J.-M., Lellouch, A.C., and Lecuit, T. (2019). Distinct RhoGEFs Activate Apical and Junctional Contractility under Control of G Proteins during Epithelial Morphogenesis. *Current Biology*, 1-24.

Edgar, B.A., and Datar, S.A. (1996). Zygotic degradation of two maternal Cdc25 mRNAs terminates Drosophila's early cell cycle program. *Genes and Development* 10, 1966-1977.

Edgar, B.A., and O'Farrell, P.H. (1989). Genetic Control of Cell Division Patterns in the Drosophila Embryo. *Cell* 57, 177-187.

Edgar, B.A., and O'Farrell, P.H. (1990). The Three Postblastoderm Cell Cycles of Drosophila Embryogenesis Are Regulated in G2 by string. *Cell* 62, 469-480.

Etournay, R., Popovic, M., Merkel, M., Nandi, A., Blasse, C., Aigouy, B., Brandi, H., Myers, G., Salbreux, G., Julicher, F., *et al.* (2015). Interplay of cell dynamics and epithelial tension during morphogenesis of the Drosophila pupal wing. *eLife* 4, e07090.

Farrell, J.A., and O'Farrell, P.H. (2014). From Egg to Gastrula: How the Cell Cycle Is Remodeled During the Drosophila Mid-Blastula Transition. *Annual Review of Genetics* 48, 269-294.

Firmino, J., Rocancourt, D., Saadaoui, M., Moreau, C., and Gros, J. (2016). Cell Division Drives Epithelial Cell Rearrangements during Gastrulation in Chick. *Developmental Cell* 36, 249-261.

Foe, V.E. (1989). Mitotic domains reveal early commitment of cells in Drosophila embryos. *Development* 107, 1-22.

Founounou, N., Loyer, N., and Le Borgne, R. (2013). Septins Regulate the Contractility of the Actomyosin Ring to Enable Adherens Junction Remodeling during Cytokinesis of Epithelial Cells. *Developmental Cell* 24, 242-255.

Fox, D.T., and Peifer, M. (2007). Abelson kinase (Abl) and RhoGEF2 regulate actin organization during cell constriction in Drosophila. *Development* 134, 567-578.

Gould, K.L., Moreno, S., Tonks, N.K., and Nurse, P. (1990). Complementation of the Mitotic Activator, p80cdc25 by a Human Protein-Tyrosine Phosphatase. *Science* 250, 1573-1576.

Großhans, J., and Wieschaus, E.F. (2000). A Genetic Link between Morphogenesis and Cell Division during Formation of the Ventral Furrow in. *Cell* 101, 523-531.

Guillot, C., and Lecuit, T. (2013). Adhesion Disengagement Uncouples Intrinsic and Extrinsic Forces to Drive Cytokinesis in Epithelial Tissues. *Developmental Cell* 24, 227-241.

Guirao, B., Rigaud, S.U., Bosveld, F., Bailles, A., Lopez-Gay, J., Ishihara, S., Sugimura, K., Graner, F., and Bellaïche, Y. (2015). Unified quantitative characterization of epithelial tissue development. *eLife* 4, e08519.

- Gutzman, J.H., and Sive, H. (2010). Epithelial relaxation mediated by the myosin phosphatase regulator Mypt1 is required for brain ventricle lumen expansion and hindbrain morphogenesis. *Development* 137, 795-804.
- Häcker, U., and Perrimon, N. (1998). DRhoGEF2 encodes a member of the Dbl family of oncogenes and controls cell shape changes during gastrulation in *Drosophila*. *Genes & Development* 12, 274-284.
- Harris, T.J.C., and Peifer, M. (2004). Adherens junction-dependent and -independent steps in the establishment of epithelial cell polarity in *Drosophila*. *The Journal of Cell Biology* 167, 135-147.
- Harris, T.J.C., and Peifer, M. (2007). aPKC Controls Microtubule Organization to Balance Adherens Junction Symmetry and Planar Polarity during Development. *Developmental Cell* 12, 727-738.
- Heer, N.C., Miller, P.W., Chanet, S., Stoop, N., Dunkel, J., and Martin, A.C. (2017). Actomyosin-based tissue folding requires a multicellular myosin gradient. *Development* 144, 1876-1886.
- Herszterg, S., Leibfried, A., Bosveld, F., Martin, C., and Bellaïche, Y. (2013). Interplay between the Dividing Cell and Its Neighbors Regulates Adherens Junction Formation during Cytokinesis in Epithelial Tissue. *Developmental Cell* 24, 256-270.
- Higashi, T., Arnold, T.R., Stephenson, R.E., Dinshaw, K.M., and Miller, A.L. (2016). Maintenance of the Epithelial Barrier and Remodeling of Cell-Cell Junctions during Cytokinesis. *Current Biology* 26, 1829-1842.
- Jaffe, A.B., and Hall, A. (2005). Rho GTPases: Biochemistry and Biology. *Annual Review of Cell and Developmental Biology* 21, 247-269.
- Jha, A., van Zanten, T.S., Philippe, J.-M., Mayor, S., and Lecuit, T. (2018). Quantitative Control of GPCR Organization and Signaling by Endocytosis in Epithelial Morphogenesis. *Current Biology* 28, 1570-1584.
- Kerridge, S., Munjal, A., Philippe, J.-M., Jha, A., de las Bayonas, A.G., Saurin, A.J., and Lecuit, T. (2016). Modular activation of Rho1 by GPCR signalling imparts polarized myosin II activation during morphogenesis. *Nature Cell Biology* 18, 261-270.
- Ko, C.S., Tserunyan, V., and Martin, A.C. (2019). Microtubules promote intercellular contractile force transmission during tissue folding. *The Journal of Cell Biology* 218, 2726-2742.
- Kölsch, V., Seher, T.C., Fernandez-Ballester, G.J., Serrano, L., and Leptin, M. (2007). Control of *Drosophila* Gastrulation by Apical Localization of Adherens Junctions and RhoGEF2. *Science* 315, 384-386.

- Kondo, T., and Hayashi, S. (2013). Mitotic cell rounding accelerates epithelial invagination. *Nature* *494*, 125-129.
- Kunda, P., Pelling, A.E., Liu, T., and Baum, B. (2008). Moesin Controls Cortical Rigidity, Cell Rounding, and Spindle Morphogenesis during Mitosis. *Current Biology* *18*, 91-101.
- LeGoff, L., and Lecuit, T. (2015). Mechanical Forces and Growth in Animal Tissues. *Cold Spring Harbor Perspectives in Biology* *8*, a019232-019218.
- Leptin, M., and Grunewald, B. (1990). Cell shape changes during gastrulation in *Drosophila*. *Development* *110*, 73-84.
- Li, Y., Naveed, H., Kachalo, S., Xu, L.X., and Liang, J. (2014). Mechanisms of Regulating Tissue Elongation in *Drosophila* Wing: Impact of Oriented Cell Divisions, Oriented Mechanical Forces, and Reduced Cell Size. *PLoS ONE* *9*, e86725-86710.
- Luxenburg, C., Pasolli, H.A., Williams, S.E., and Fuchs, E. (2011). Developmental roles for Srf, cortical cytoskeleton and cell shape in epidermal spindle orientation. *Nature Cell Biology* *13*, 203-314.
- Maddox, A.S., and Burridge, K. (2003). RhoA is required for cortical retraction and rigidity during mitotic cell rounding. *The Journal of Cell Biology* *160*, 255-265.
- Manning, A.J., Peters, K.A., Peifer, M., and Rogers, S.L. (2013). Regulation of Epithelial Morphogenesis by the G Protein–Coupled Receptor Mist and Its Ligand Fog. *Science Signaling* *6*, ra98.
- Mao, Y., Hoppe, A., Kester, L., Thompson, B.J., Tournier, A.L., and Tapon, N. (2013). Differential proliferation rates generate patterns of mechanical tension that orient tissue growth. *The EMBO Journal* *32*, 2790-2803.
- Martin, A.C., Gelbart, M., Fernandez-Gonzalez, R., Kaschube, M., and Wieschaus, E.F. (2010). Integration of contractile forces during tissue invagination. *The Journal of Cell Biology* *188*, 735-749.
- Mason, F.M., Tworoger, M., and Martin, A.C. (2013). Apical domain polarization localizes actin--myosin activity to drive ratchet-like apical constriction. *Nature Cell Biology* *15*, 926-936.
- Mason, F.M., Xie, S., Vasquez, C.G., Tworoger, M., and Martin, A.C. (2016). RhoA GTPase inhibition organizes contraction during epithelial morphogenesis. *The Journal of Cell Biology* *214*, 603-617.
- Mata, J., Curado, S., Ephrussi, A., and Rørth, P. (2000). Tribbles Coordinates Mitosis and Morphogenesis in *Drosophila* by Regulating String/CDC25 Proteolysis. *Cell* *101*, 511-522.

- Matthews, H.K., Delabre, U., Rohn, J.L., Guck, J., Kunda, P., and Baum, B. (2012). Changes in Ect2 Localization Couple Actomyosin-Dependent Cell Shape Changes to Mitotic Progression. *Developmental Cell* 23, 371-383.
- Mizuno, T., Amano, M., Kaibuchi, K., and Nishida, Y. (1999). Identification and characterization of Drosophila homolog of Rho-kinase. *Gene* 238, 437-444.
- Perez-Mockus, G., Mazouni, K., Roca, V., Corradi, G., Conte, V., and Schweisguth, F. (2017). Spatial regulation of contractility by Neuralized and Bearded during furrow invagination in Drosophila. *Nature Communications* 8, 1594.
- Ramanathan, S.P., Helenius, J., Stewart, M.P., Cattin, C.J., Hyman, A.A., and Muller, D.J. (2015). Cdk1-dependent mitotic enrichment of cortical myosin II promotes cell rounding against confinement. *Nature Cell Biology* 17, 148-159.
- Ramkumar, N., and Baum, B. (2016). Coupling changes in cell shape to chromosome segregation. *Nature Review Molecular Cell Biology* 17, 511-521.
- Reinsch, S., and Karsenti, E. (1994). Orientation of spindle axis and distribution of plasma membrane proteins during cell division in polarized MDCKII cells. *The Journal of Cell Biology* 126, 1509-1526.
- Rogers, S.L., Wiedemann, U., Häcker, U., Turck, C., and Vale, R.D. (2004). Drosophila RhoGEF2 Associates with Microtubule Plus Ends in an EB1-Dependent Manner. *Current Biology* 14, 1827-1833.
- Rosa, A., Vlassaks, E., Pichaud, F., and Baum, B. (2015). Ect2/Pbl Acts via Rho and Polarity Proteins to Direct the Assembly of an Isotropic Actomyosin Cortex upon Mitotic Entry. *Developmental Cell* 32, 604-616.
- Royou, A., Sullivan, W., and Karess, R. (2002). Cortical recruitment of nonmuscle myosin II in early syncytial Drosophila embryos: its role in nuclear axial expansion and its regulation by Cdc2 activity. *The Journal of Cell Biology* 158, 127-137.
- Russell, P., and Nurse, P. (1986). cdc25+ Functions as an Inducer in the Mitotic Control of Fission Yeast. *Cell* 45, 145-153.
- Sawyer, J.M., Harrell, J.R., Shemer, G., Sullivan-Brown, J., Roh-Johnson, M., and Goldstein, B. (2010). Apical constriction: A cell shape change that can drive morphogenesis. *Developmental Biology* 341, 5-19.
- Seher, T.C., and Leptin, M. (2000). Tribbles, a cell-cycle brake that coordinates proliferation and morphogenesis during Drosophila gastrulation. *Current Biology* 10, 623-629.
- Simões, S.d.M., Blankenship, J.T., Weitz, O., Farrell, D.L., Tamada, M., Fernandez-Gonzalez, R., and Zallen, J.A. (2010). Rho-Kinase Directs Bazooka/Par-3 Planar Polarity during Drosophila Axis Elongation. *Developmental Cell* 19, 377-388.

Sorce, B., Escobedo, C., Toyoda, Y., Stewart, M.P., Cattin, C.J., Newton, R., Banerjee, I., Stettler, A., Roska, B., Eaton, S., *et al.* (2015). Mitotic cells contract actomyosin cortex and generate pressure to round against or escape epithelial confinement. *Nature Communications* 6, 8872.

Stewart, M.P., Helenius, J., Toyoda, Y., Ramanathan, S.P., Muller, D.J., and Hyman, A.A. (2010). Hydrostatic pressure and the actomyosin cortex drive mitotic cell rounding. *Nature* 469, 226-230.

Suarez, C., and Kovar, D.R. (2016). Internetwork competition for monomers governs actin cytoskeleton organization. *Nature Review Molecular Cell Biology* 17, 799-810.

Sui, L., Alt, S., Weigert, M., Dye, N., Eaton, S., Jug, F., Myers, E.W., Julicher, F., Salbreux, G., and Dahmann, C. (2018). Differential lateral and basal tension drive folding of *Drosophila* wing discs through two distinct mechanisms. *Nature Communications* 9, 4620.

Sweeton, D., Parks, S., Costa, M., and Wieschaus, E.F. (1991). Gastrulation in *Drosophila*: the formation of the ventral furrow and posterior midgut invaginations. *Development* 112, 775-789.

Tozluoglu, M., Duda, M., Kirkland, N.J., Barrientos, R., Burden, J.J., Muñoz, J.J., and Mao, Y. (2019). Planar Differential Growth Rates Initiate Precise Fold Positions in Complex Epithelia. *Developmental Cell* 51, 299-312.

West, J.J., Zulueta-Coarasa, T., Maier, J.A., Lee, D.M., Bruce, A.E.E., Fernandez-Gonzalez, R., and Harris, T.J.C. (2017). An Actomyosin-Arf-GEF Negative Feedback Loop for Tissue Elongation under Stress. *Current Biology* 27, 1-24.

Yoshizaki, H., Ohba, Y., Kurokawa, K., Itoh, R.E., Nakamura, T., Mochizuki, N., Nagashima, K., and Matsuda, M. (2003). Activity of Rho-family GTPases during cell division as visualized with FRET-based probes. *The Journal of Cell Biology* 162, 223-232.

Young, P.E., Pesacreta, T.C., and Kiehart, D.P. (1991). Dynamic changes in the distribution of cytoplasmic myosin during *Drosophila* embryogenesis. *Development* 111, 1-14.

**Table S1**

| <b>Stock</b> | <b>Genotype</b>                                              | <b>Source</b>                                                                |
|--------------|--------------------------------------------------------------|------------------------------------------------------------------------------|
| 1            | w; P{w+ Ubi-H2A::GFP}3                                       | Bloomington Drosophila Stock Center                                          |
| 2            | w; gap43::mCherry-7/TM3                                      | Lab stock                                                                    |
| 3            | y, w; P{w+ sqh::GFP}42; Df(3L)ri-79c/TM3, Sb[1]              | This study                                                                   |
| 4            | y, w; P{w+ sqh::GFP}42; P{EP}trblEP3519/TM3, Sb[1]           | This study                                                                   |
| 5            | y, w; sqh::mCherry, Utr-ABD::GFP; P{EP}trblEP3519/TM3, Sb[1] | This study                                                                   |
| 6            | UAS-fog 9A/TM3, Sb, Ser                                      | Dawes-Hoang et al., 2005                                                     |
| 7            | y, sc, v, sev; P{TRiP.GL01052}attp2                          | DRSC/TRiP                                                                    |
| 8            | w; mat67, Sqh::GFP; mat15, Gap43::mCherry/TM3, Sb[1]         | Vasquez et al., 2014                                                         |
| 9            | y, w; mat67, Sqh::mCherry; mat15, E-cadherin::GFP            | Mason et al., 2016                                                           |
| 10           | arm043A01, FRT101/FM7; sqh::GFP                              | Martin et al., 2010                                                          |
| 11           | ovoD1, FRT101; hsFLP                                         | Martin et al., 2010                                                          |
| 12           | y, w; sqh>rok(K116A)::GFP; Df(3L)ri-79c/TM3, Sb[1]           | Sqh>rok (K116A) is gift from J. Zallen, S. Simoes, and R. Fernandez-Gonzalez |
| 13           | y, w; sqh>rok(K116A)::GFP; P{EP}trblEP3519/TM3, Sb[1]        | Sqh>rok (K116A) is gift from J. Zallen, S. Simoes, and R. Fernandez-Gonzalez |
| 14           | w; P{UAS-stg}/CyO                                            | Bloomington Drosophila Stock Center                                          |
| 15           | w; mat67, UAS-BazGFP[r1]/CyO                                 | Eric Wieschaus (Wang et al., 2012)                                           |
| 16           | w; P{sqh-pbl-EGFP}30                                         | Bloomington Drosophila Stock Center                                          |
| 17           | y, w; Df(3L)ri-79c/TM3, Sb[1]                                | Bloomington Drosophila Stock Center                                          |

| <b>Figure</b>       | <b>Stocks used<br/>(Female x Male)</b> |
|---------------------|----------------------------------------|
| 1                   | 1 x 2                                  |
| 2A                  | 5 x 17                                 |
| 2B                  | 3 x 4                                  |
| 2D-F; 4C-D;<br>5A-E | 6 x 8                                  |
| 3A-D                | 10 x 11                                |
| 3E-G                | 15 Sibling Cross                       |
| 4A-B                | 12 x 13                                |
| 4E                  | 16 Sibling Cross                       |
| 5C-E                | 7 x 9                                  |
| S1                  | 14 x 8; 3 x 4                          |
| S2                  | 7 x 9                                  |
| S3                  | 6 x 8; 7 x 9                           |



## Figure legends

**Figure 1. Premature mitotic entry in *trbl* mutant embryos reverses apical constrictions.** (A-A') During wild-type ventral furrow (VF, blue dashed line) formation, cells apically constrict. (A) Images are maximum intensity projections from a live embryo expressing H2A::GFP and Gap43::mCherry. (A') Representative cells were segmented and their apical cell areas were tracked over time. The average trace of 12 cells with standard deviation is shown on the right. (B-B') In *trbl* RNAi embryos, mesoderm cells prematurely divide and increase apical area. (B) Images are maximum intensity projections from a live embryo expressing H2A::GFP and Gap43::mCherry injected with *trbl* dsRNA. (B') Representative cells were segmented and their apical cell areas were tracked over time. The average trace of 12 cells with standard deviation is shown on the right. (C) Individual cells in *trbl* embryos can initiate constriction and reverse their constricted shape upon mitotic entry. Images are maximum intensity projections from a live embryo expressing H2A::GFP and Gap43::mCherry injected with *trbl* dsRNA. An outline of the cell marked by the asterisk in the images is shown on the right. (C') Quantification of changes in cell area for cells that initiate but reverse constriction after mitotic entry. Individual traces of 9 cells over 2 representative embryos injected with *trbl* dsRNA and the average with standard deviation are plotted. (D) Cartoon diagram depicting isotropic and anisotropic constrictions. Cell apex anisotropy is calculated as the cell length along the anteroposterior axis (AP, x) over the dorsoventral axis (DV, y). (E) Dividing cells in *trbl* RNAi embryos become more isotropic. Quantification of cell apex anisotropy over time in control and *trbl* RNAi embryos (after apical constriction has initiated). Scale bars, 20  $\mu\text{m}$  (A and B), 10  $\mu\text{m}$  (C).

**Figure 2. Apical myosin activation is disrupted upon mitotic entry.** (A) Apical myosin is disrupted in cells that prematurely divide in *trbl* embryos. Images are maximum intensity projections from a live trans-heterozygous embryo (Df/EP3519) expressing Myo::CH (Sqh::CH) and Utr::GFP (Actin). Sub-apical sections of the Utr::GFP channel were used to mark cell outlines. Control embryos are heterozygotes with a wild-type copy of *trbl*. (B) Montage of a Df/EP3519 embryo expressing Myo::GFP, which shows apical myosin dissipates as cells round. The outline of one cell is highlighted by yellow dashed lines. The cell outline was determined from the sub-apical myosin signal. (C) Cartoon diagram showing mitotic domains (MD) 1,3, and 5 (blue, red, and orange, respectively). (D) Apical myosin is lost in mitotic domain cells in the ectoderm. Images are maximum intensity projections from a live embryo with ectopic *fog* in the ectoderm expressing Myo::GFP and Gap43::mCherry. (E) Montage of *fog*-overexpressing embryo with Myo::GFP and Gap43::mCherry. Apical myosin reaccumulates in both daughter cells after mitosis completes. Midbody is marked by the yellow arrowhead. (F) Quantification of mean cell area (lilac) and mean myosin intensity (green) with standard deviations for a representative *fog*-overexpressing embryo (n = 10 cells). Scale bars, 15  $\mu\text{m}$  (A and D), 10  $\mu\text{m}$  (E), 5  $\mu\text{m}$  (B).

**Figure 3. Apical contractility loss is not due to disrupted adhesion or apical-basal polarity.** (A) In *arm* mutants, cells become mechanically uncoupled and the supracellular myosin meshwork fragmented. Images are maximum intensity projections

from control (wild-type) and maternal and zygotic *arm* mutants expressing Myo::GFP. Cross-section views are to the right of each *en face* view. (B) Apical contractility is sustained in cells with rounded morphology in *arm* mutants. Image is a maximum intensity projection from a live maternal and zygotic *arm* mutant expressing Myo::GFP. (C) Apical myosin is lost during mitosis in rounded *arm* mutant cells. Images are maximum intensity projections from a maternal and zygotic *arm* mutant expressing Myo::GFP (magnified images from red box in B, starting at a later time point). Cytokinetic furrows are highlighted by yellow arrowheads. (D) Quantification of average medial myosin intensity in *arm* mutant cells. Myosin intensity was measured before mitosis by selecting cells just prior to nuclear envelope breakdown and compared to myosin intensities in cells just prior to cytokinesis (n = 20 cells; \*\*\*, P < .0001, unpaired t test). Bottom and top edges of the boxplot are 25<sup>th</sup> and 75<sup>th</sup> percentiles, with median marked by the white line. Whiskers extend to the most extreme data points. (E) Baz polarity is unaffected during mitosis. Images are apical (top) and basal (~8  $\mu$ m below apical slice; bottom) *en face* views of embryos with ectopic *fog* expressing GFP-tagged Baz. Cross-section views of mitotic cells are shown in (F). Mitotic cells are marked with white asterisks. (G) Baz is apically polarized in both mitotic and non-mitotic cells. Quantification of the ratio of maximum pixel intensity values of Baz::GFP in the apical to basolateral domain (n = 30 cells each across 3 embryos; unpaired t test). Bottom and top edges of the boxplot are 25<sup>th</sup> and 75<sup>th</sup> percentiles, with median marked by the white line. Whiskers extend to the most extreme data points. Scale bars, 15  $\mu$ m (A, B, and E), 10  $\mu$ m (C), 5  $\mu$ m (F).

**Figure 4. Different Rho GEFs exhibit distinct localization changes upon mitotic entry.** (A) Medioapical ROCK localization is not sustained in *trbl* mutants. Images are maximum intensity projections from embryos that are either trans-heterozygous for the deficiency and P-element insertion (mutant) or not trans-heterozygous (control). Embryos are also expressing kinase dead rok(K116A)::GFP. (B) Apical ROCK foci (green arrows) disappear during mitosis. Montage from the *trbl* mutant embryo shown in (A). A cytokinetic ring is highlighted by the yellow arrowheads. (C) RhoGEF2 localization is less cortical and more cytoplasmic in mitotic cells. Images are single sub-apical slices of a fixed representative *fog* overexpressing embryo immunostained against GFP-tagged RhoGEF2 and phalloidin to visualize F-actin. Asterisks mark mitotic cells in the cross-section images (bottom) with cytoplasmic enrichment of RhoGEF2 highlighted by yellow arrowheads. (D). RhoGEF2 becomes enriched in the cytoplasm in mitotic cells. Quantification of the ratio of average cytoplasmic to junctional RhoGEF2 intensity in mitotic or non-mitotic cells (n = 20 cells across 4 embryos; \*\*\*, P < .0001, unpaired t test). Bottom and top edges of the boxplot are 25<sup>th</sup> and 75<sup>th</sup> percentiles, with median marked by the white line. Whiskers extend to the most extreme data points. (E) Pebble/Ect2 localizes to the cortex after mitotic entry in mitotic domain 3. Images are maximum intensity projections from a live embryo expressing Pbl::GFP under a myosin promoter. One mitotic cell from a mitotic domain and its daughter cells are marked by the asterisks. The site of cytokinetic furrow formation is marked by the yellow arrowhead. Scale bars, 15  $\mu$ m (A), 10  $\mu$ m (B - E).

**Figure 5. Ectopic furrows form between mitotic domains in embryos with ectopic *fog* expression.** (A) Non-mitotic, contractile cells between mitotic domains invaginate during gastrulation. Images are maximum intensity projections from a live *fog* overexpressing embryo expressing Myo::GFP and Gap43::mCherry. The ectopic furrow is shown by a white dashed line. The invagination posterior to mitotic domain (MD) 5 is the cephalic furrow (CF). (B) Cross-section views of local tissue invaginations from the embryo in (A). Images from control embryo not ectopically expressing *fog* are in Figure S2. (C) Quantification of apical cell area and cell apex anisotropies in non-mitotic (salmon in cartoon) and mitotic (mint green in cartoon) cells. Final cell area was evaluated just before mitotic cells formed cytokinetic furrows. The time elapsed between initial and final cell area was between 5 and 20 minutes. Across 6 representative *fog* overexpressing embryos, 26 furrow cells and 33 mitotic domain cells were analyzed. Across 5 representative control embryos (Rhodopsin 3 shRNA line), 133 non-mitotic cells and 66 mitotic domain cells were analyzed (\*\*\*,  $P < .0001$ ; \*\*,  $P < .01$ , unpaired  $t$  test). For changes in cell area, significance from 0 was determined with a one sample  $t$  test. Bottom and top edges of the boxplot are 25<sup>th</sup> and 75<sup>th</sup> percentiles, with median marked by the white line. Whiskers extend to the most extreme data points. (D) Cell aspect ratio increases more in embryos with ectopic *fog* expression. Quantification of mean change in cell aspect ratio with standard deviations between a representative control (Rhodopsin 3 shRNA line) and ectopic *fog* expression embryo. Cell aspect ratio is calculated as the distance from the centroid of a fitted ellipse to the ellipse edge along the major axis ( $a$ ) over the distance along the minor axis ( $b$ ). For ectopic *fog* expression embryos, 6 cells were quantified, and 7 cells were quantified for control embryos. Aspect ratio was measured up to the start of cytokinesis. (E) Apical constriction of non-mitotic cells initiate when neighboring mitotic domain cells enter mitosis. Quantification of apical cell area in a representative *fog* overexpressing embryo. Individual cell traces as well as averages with standard deviation are shown for mitotic domain cells (mint;  $n = 6$  cells) and non-mitotic domain cells (salmon;  $n = 28$  cells). The initiation of mitotic rounding is marked by the arrow. Scale bars, 15  $\mu\text{m}$ .

**Figure 6. Different patterns of mitotic entry result in distinct morphogenetic outcomes.** Cartoon diagram of a model contractile epithelium with different spatial patterns of mitotic entry. Apically constricting cells (yellow) that enter mitosis (blue) lose medioapical myosin and reverse their constricted cell shape (summarized in box). In the *trbl* mutant (top), most of the cells in the contractile tissue enter mitosis, which disrupts tissue folding. Mitotic cells in the mesoderm expand isotropically (magenta arrows). In contrast, when mitotic cells are interspersed by non-mitotic cells that sustain apical contractility, such as in the dorsal head of embryos with ectopic *fog* expression (bottom), mitotic cells that lose medioapical myosin expand anisotropically (magenta arrows) as they are pulled towards constricting cells (green arrows).

## Supplementary Information

**Video 1. *Trbl* RNAi causes premature cell divisions in the mesoderm.** Embryos expressing Histone::GFP (H2A; green) and Gap43::mCH (magenta) injected with buffer (top) or dsRNA (bottom). Images were acquired every 15 seconds (top) or 22 seconds (bottom) and videos are displayed at 15 frames per second. Bars, 20  $\mu\text{m}$ .

**Video 2. Apical myosin is lost during mitosis in *trbl* mutants.** Trans-heterozygous embryo (Df/EP3519), which displays the *trbl* phenotype, expressing Myo::GFP. Images were acquired every 6 seconds and video is displayed at 20 frames per second. Note that apical myosin is lost and then returns after mitotic exit. Bars, 20  $\mu\text{m}$ .

**Video 3. Ectopic expression of *fog* in the ectoderm.** Embryos with ectopic *fog* overexpression expressing Myo::GFP (green) and Gap43::mCH (magenta). Medioapical myosin is lost in mitotic cells and ectopic furrows form between mitotic domains. Images were acquired every 17 seconds and video is displayed at 15 frames per second. Bars, 20  $\mu\text{m}$ .

### Supplementary Figures

**Figure S1. Overexpressing *string* (CDC25) results in the completion of cycle 14 divisions before ventral furrow formation.** (A) Images are maximum intensity projections of a live *string* overexpressing embryo with Myo::GFP and Gap43::mCherry. A cytokinetic furrow from a premature division in the mesoderm is highlighted by a yellow arrowhead. The embryo is slightly rotated and ventral is towards the bottom. (B) Medioapical myosin returns in ventral cells of *trbl* embryos after completion of mitosis. Images are maximum intensity projections of a projections from a live trans-heterozygous embryo (Df/EP3519) expressing Myo::GFP. Scale bars, 15  $\mu\text{m}$ .

**Figure S2. Furrows do not normally form between mitotic domains and mitotic cells do not normally elongate in the dorsal head.** Images are maximum intensity projections from a live control embryo (Rhodopsin 3 shRNA line) expressing Myo::CH and E-cadherin::GFP. Image acquisition field is slightly more anterior; the cephalic furrow lies posterior to mitotic domain 5. Scale bars, 15  $\mu\text{m}$ .

**Figure S3. Mitotic cells are more elongated when *fog* is ectopically expressed.** (A) Representative mitotic domain 3 cells from control (Rhodopsin 3 shRNA line) and ectopic *fog* expression embryos are segmented and shown here. Initial cell size was set 7 minutes prior to cytokinetic ring formation. (B) Mitotic cells become stretched towards the ectopic furrow (dashed line). Images are maximum intensity projections of *fog* overexpressing embryos expressing E-cadherin::GFP. The same cell is highlighted by the yellow asterisk. The axis of stretch is indicated by the double-sided arrow. The body axes of the embryo (AP, orange; DV, purple) are shown on the bottom set of images. Scale bars, 15  $\mu\text{m}$  (B, top), 10  $\mu\text{m}$  (A and B, bottom).

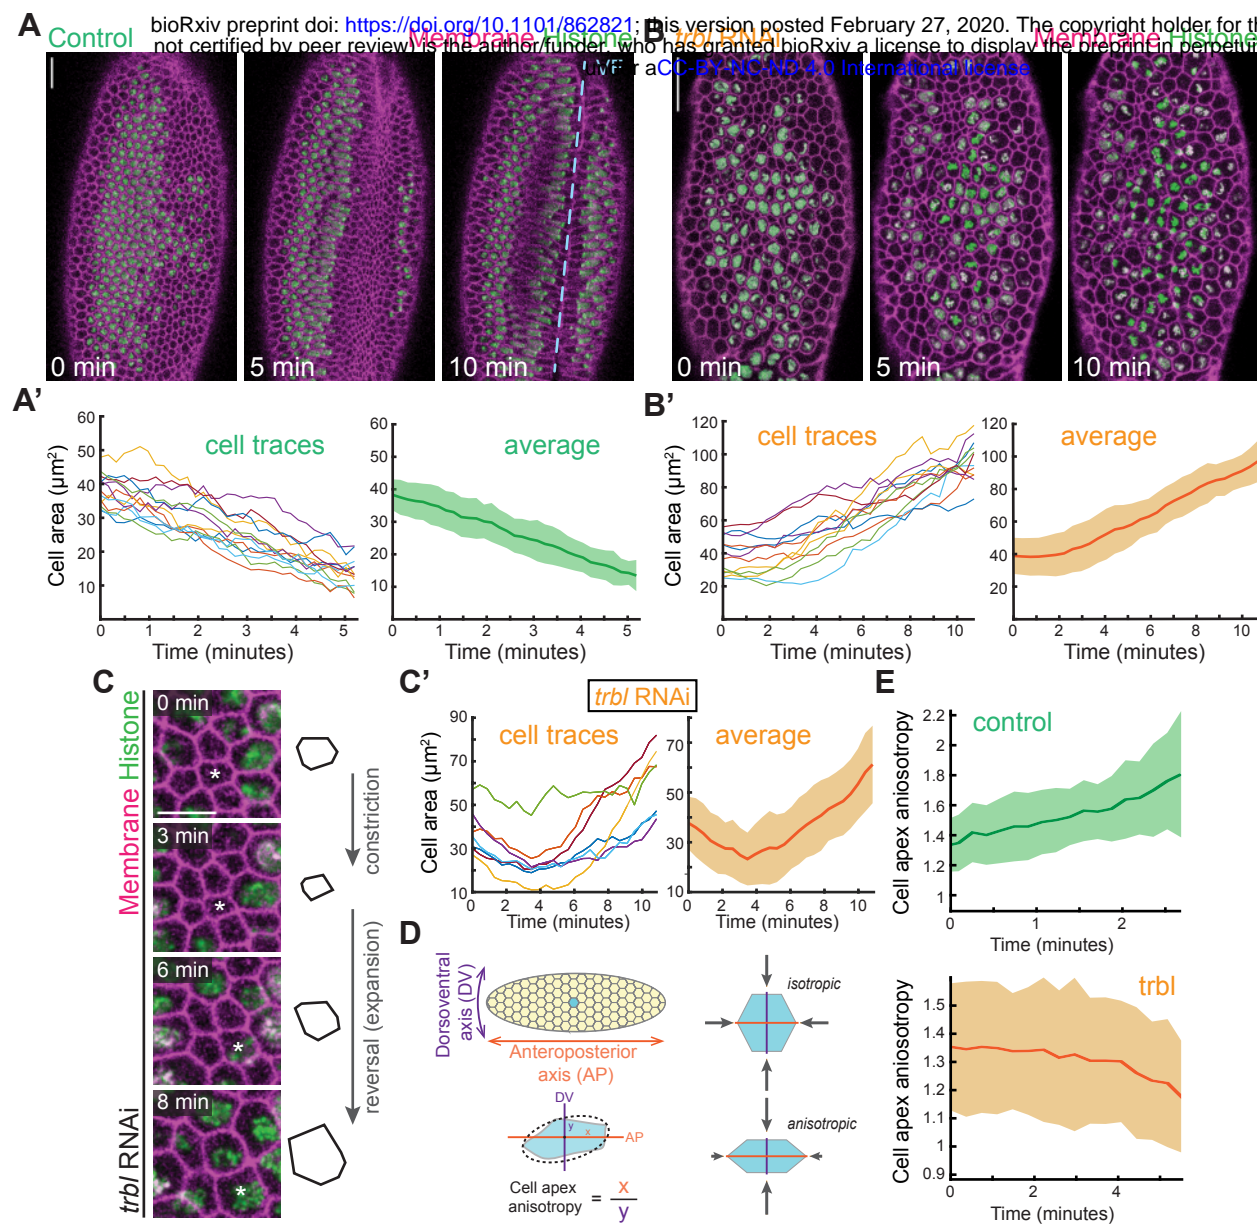

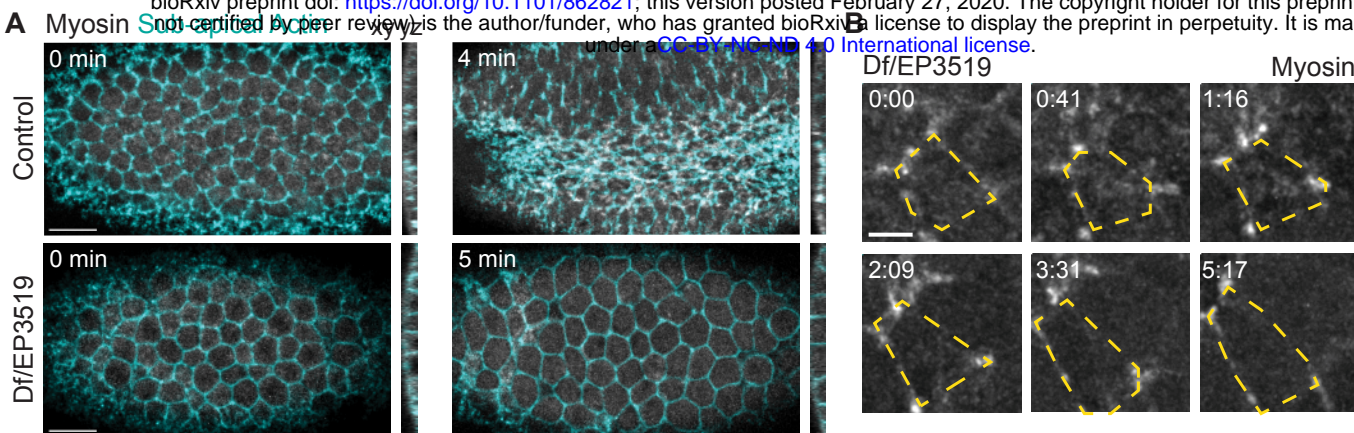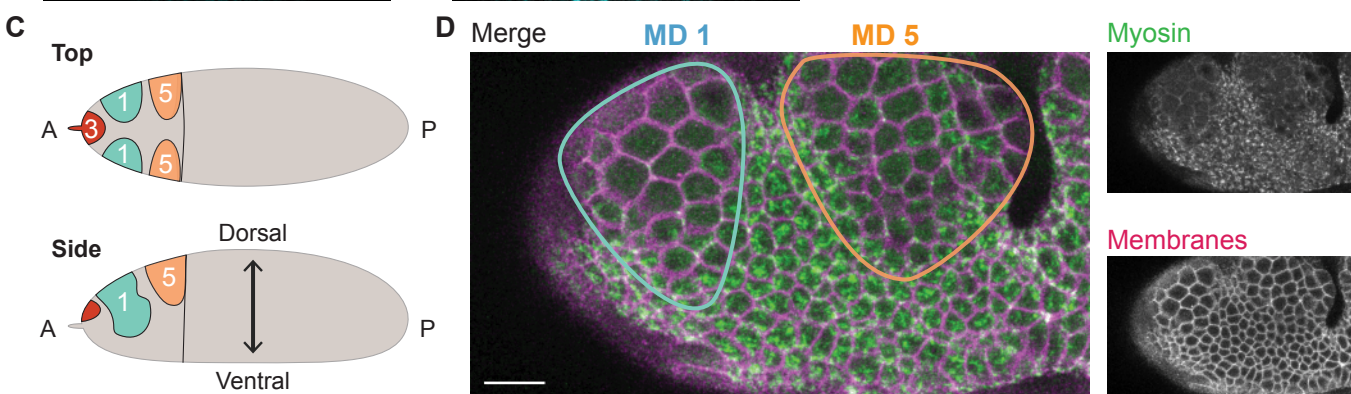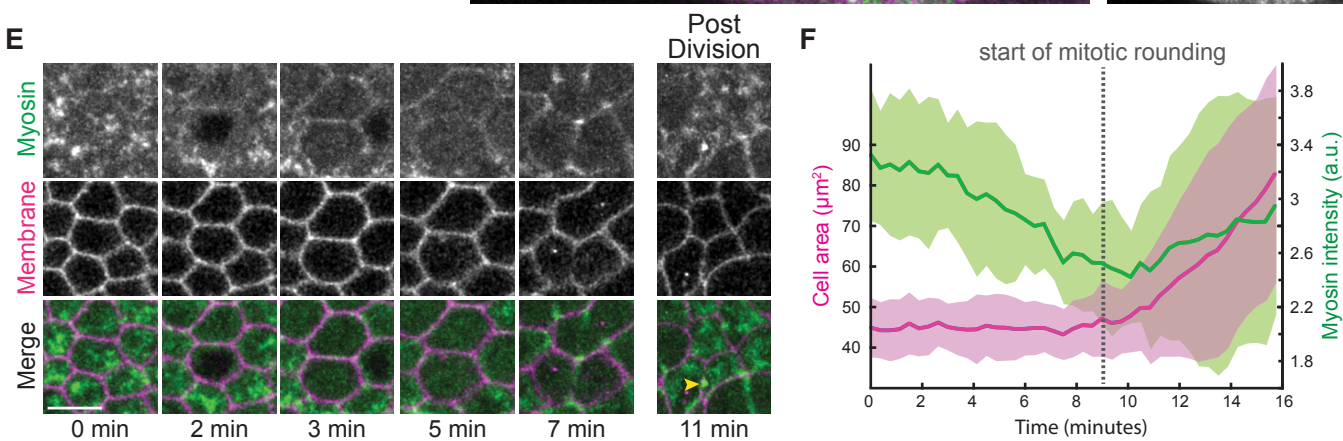

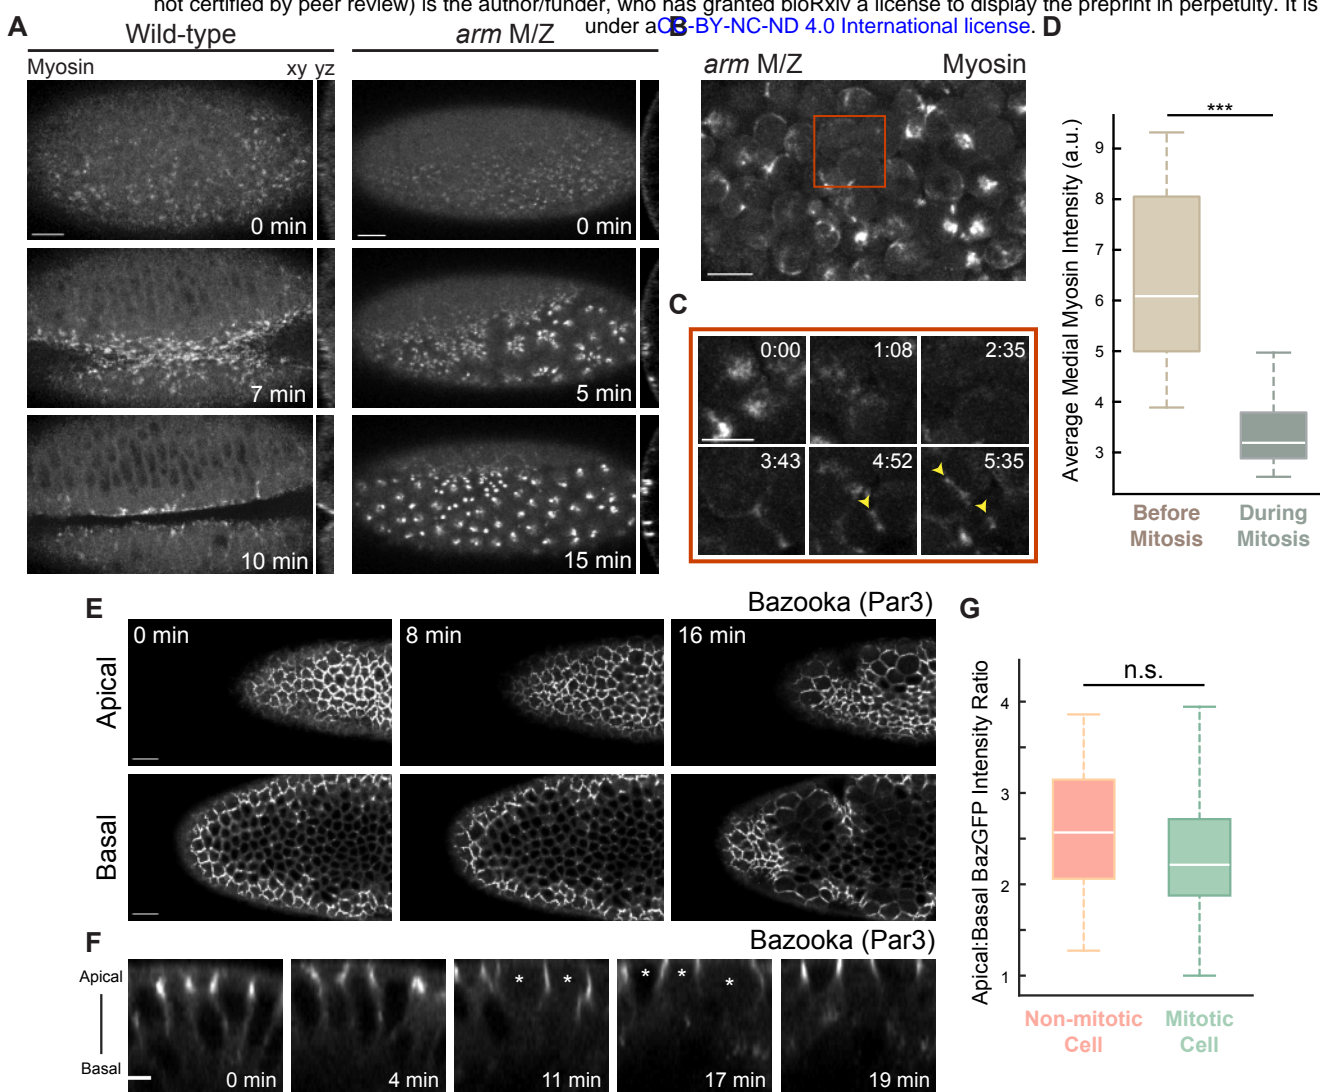

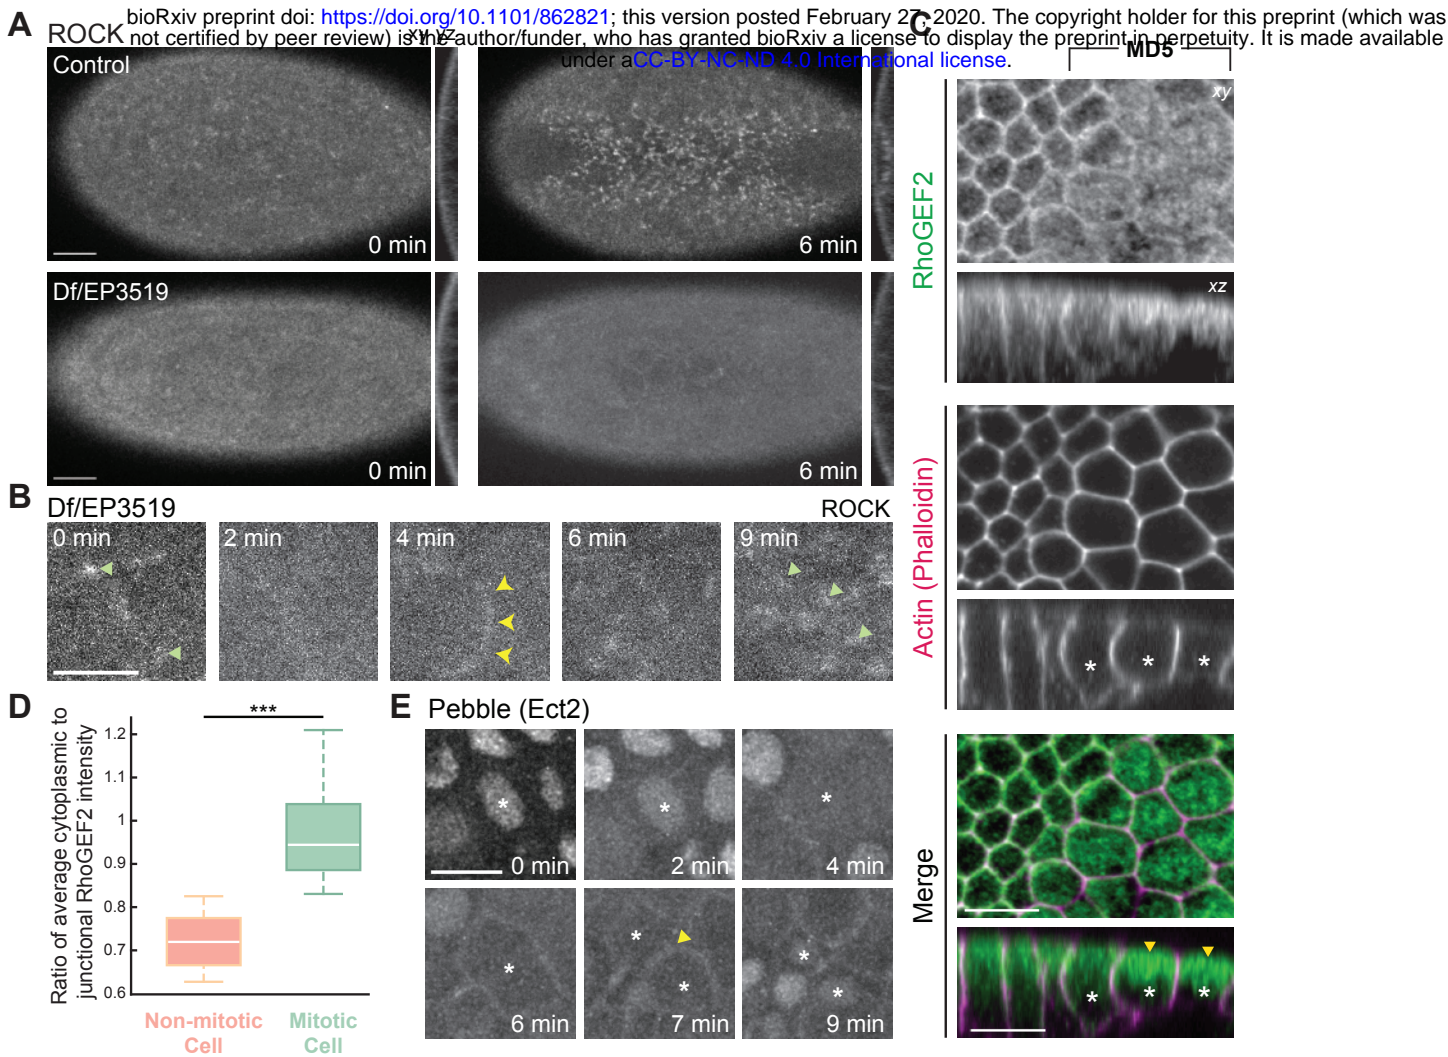



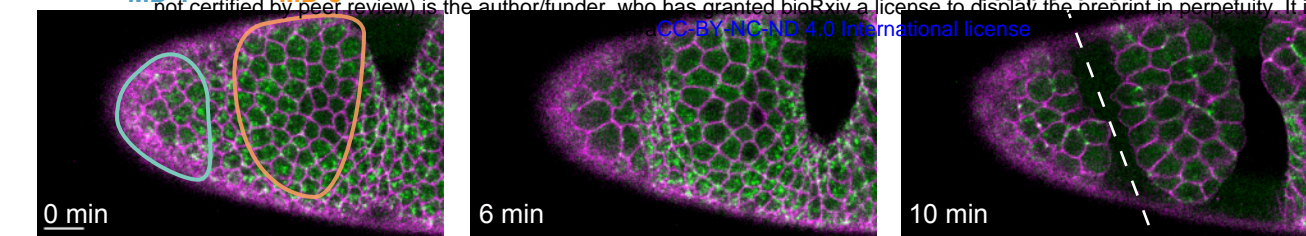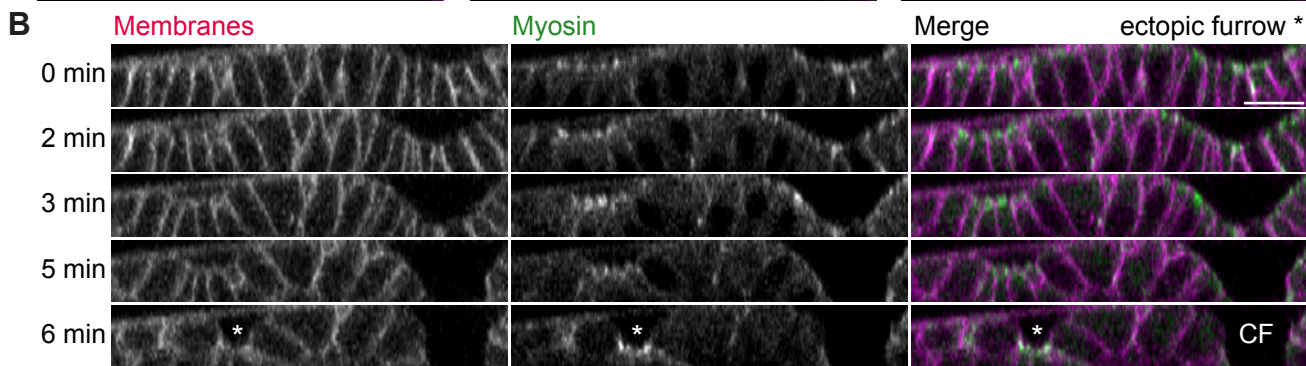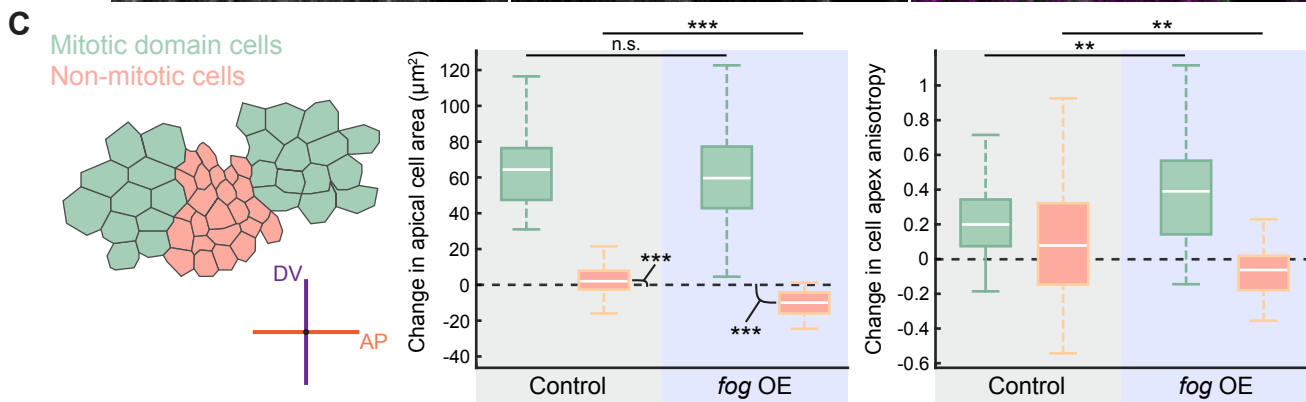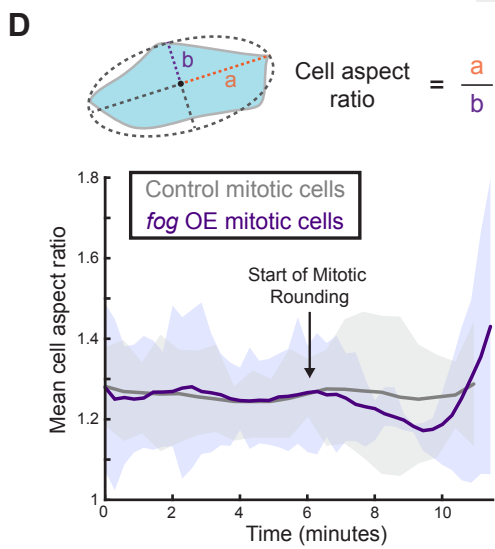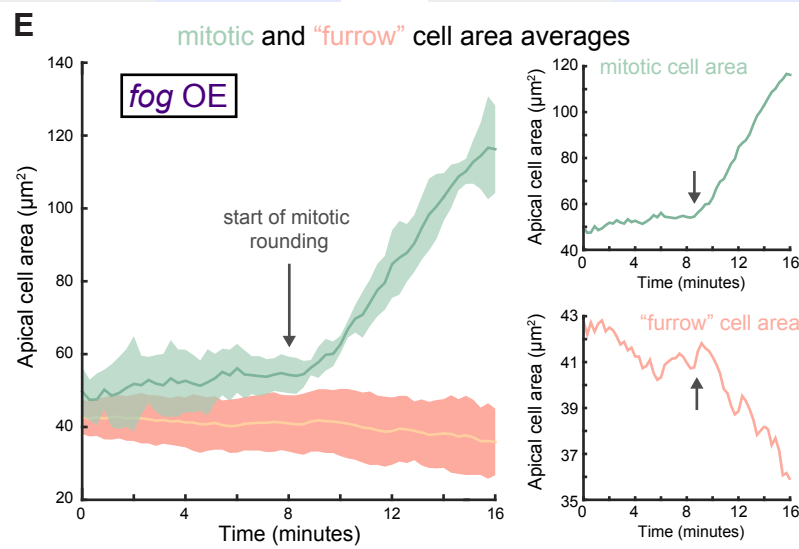

Loss of apical constriction across the tissue prevents mesoderm invagination

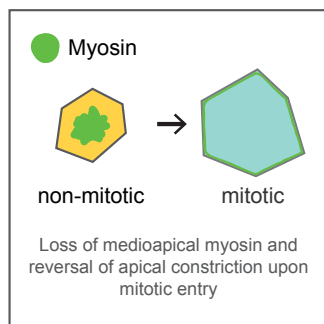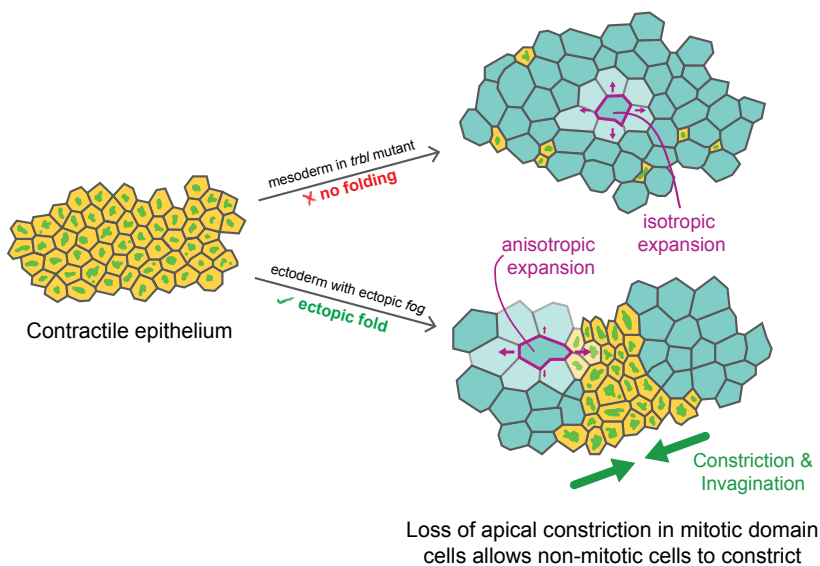

**A**

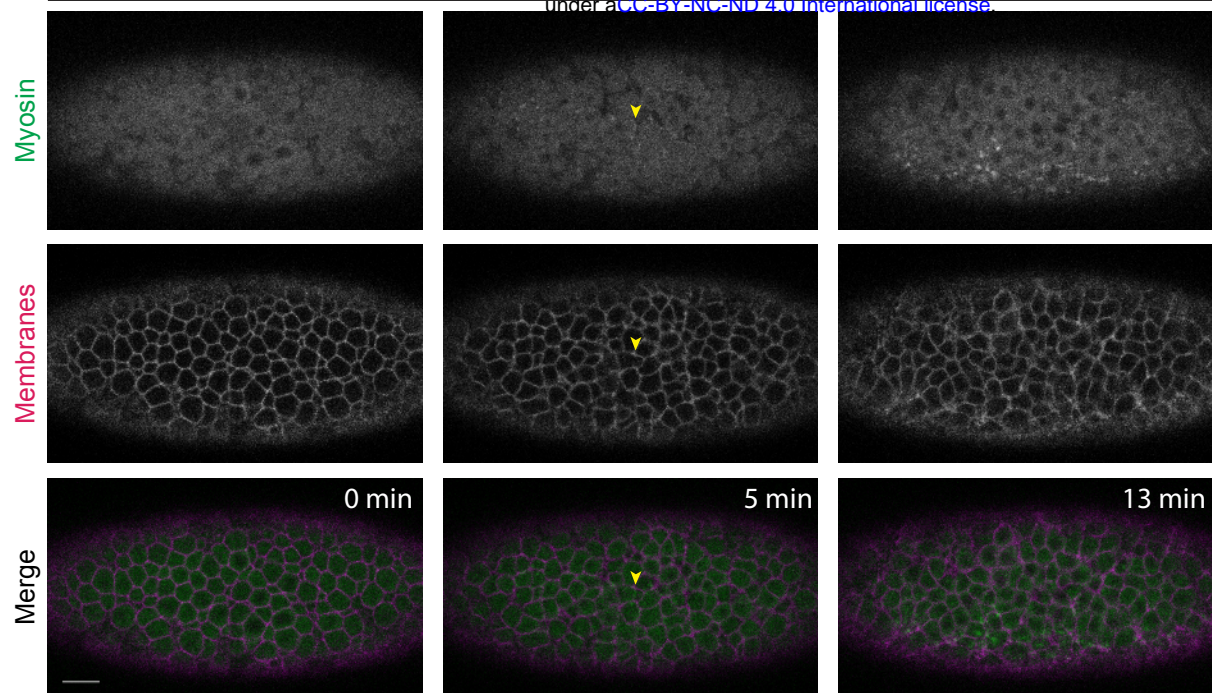

**B**

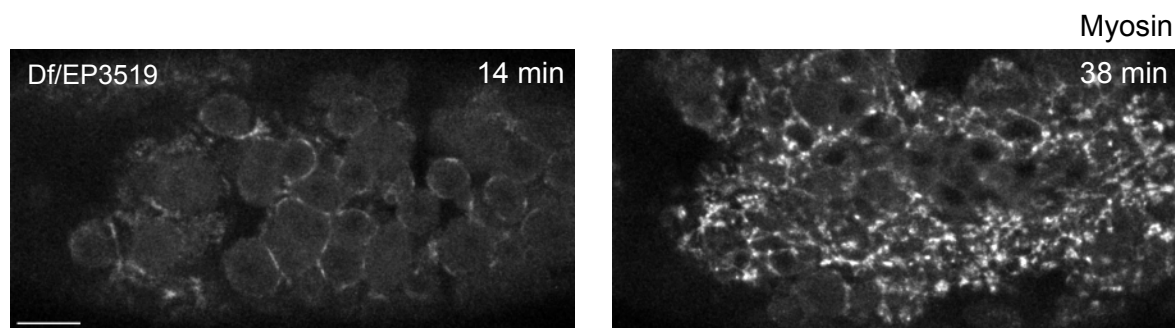

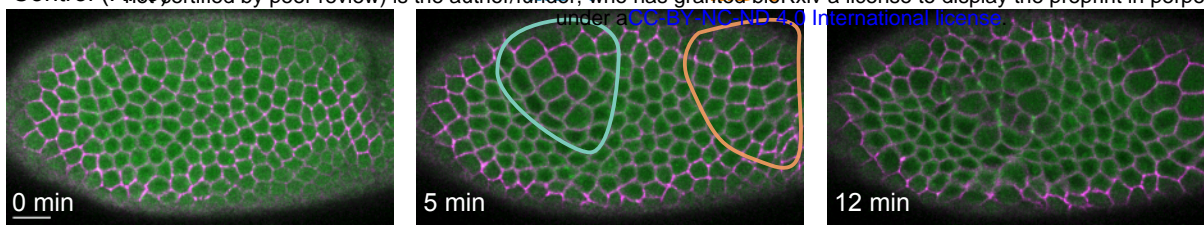

E-cadherin

Myosin

Merge

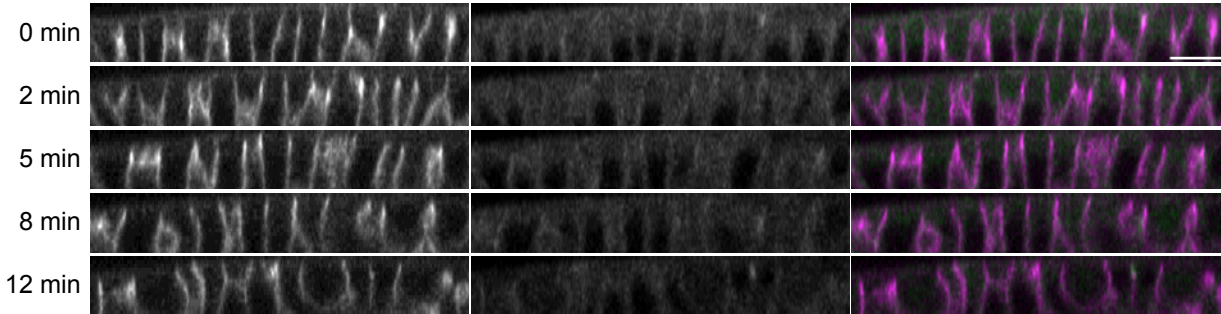

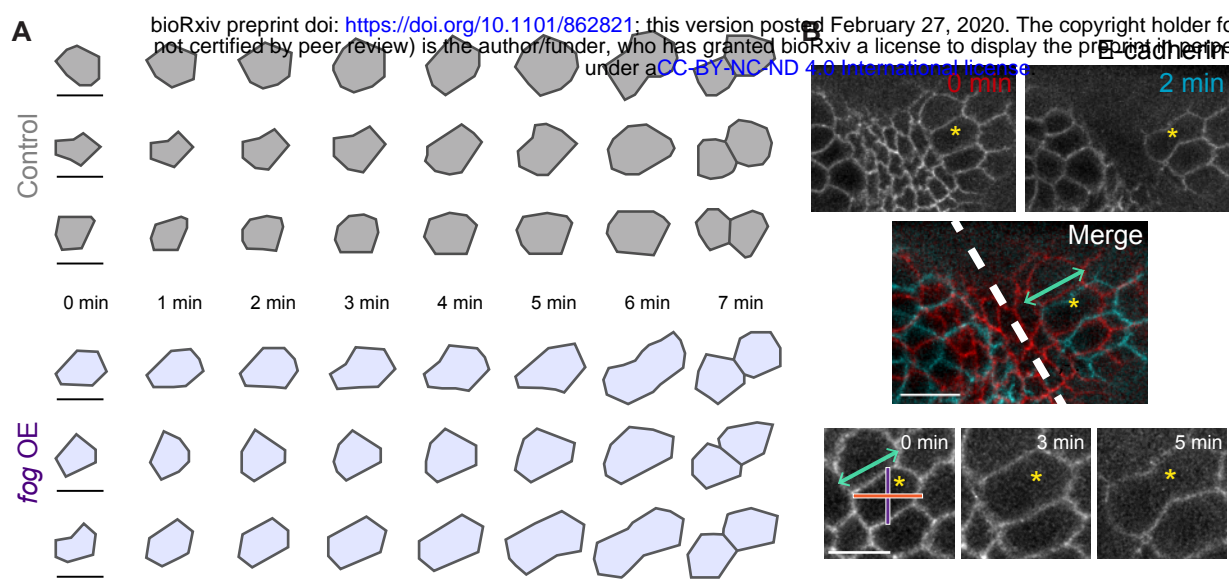

Source: https://www.biorxiv.org/content/10.1101/862821v2.full.pdf
